# Supplementary material for: Rapid proteolysis of gluten-derived immunogenic peptides in bread by actinidin in a combined in vivo and in vitro oro-gastrointestinal digestion model
Source: Royal Society of Chemistry journal article supplement (doi:10.1039/d1fo03740d), 2022-01-01
Supplement: d1fo03740d1.pdf [file d1fo03740d1.pdf]

**Supplementary Table 1.** Liquid Inflows and gastric emptying in the human gastric simulator

| Time<br>(min) | HCl<br>Inflow 1*           |                  | SGF + Pepsin<br>Inflow 2*  |                  | Total liquid<br>entered into HGS<br>(mL) | Gastric<br>emptying<br>(mL) |
|---------------|----------------------------|------------------|----------------------------|------------------|------------------------------------------|-----------------------------|
|               | Amount<br>released<br>(mL) | Rate<br>(mL/min) | Amount<br>released<br>(mL) | Rate<br>(mL/min) |                                          |                             |
| 10            | 21                         | 0.7              | 69                         | 2.3              | 30                                       | 23                          |
| 20            |                            |                  |                            |                  | 30                                       | 51                          |
| 30            |                            |                  |                            |                  | 30                                       | 46                          |
| 60            | 25                         | 0.8              | 81                         | 2.7              | 106                                      | 114                         |
| 90            | 14                         | 0.5              | 39                         | 1.3              | 53                                       | 90                          |
| 120           | 13                         | 0.4              | 18                         | 0.6              | 31                                       | 49                          |
| 150           | 12                         | 0.4              | 10                         | 0.3              | 22                                       | 24                          |
| 180           | 9                          | 0.3              | 9                          | 0.3              | 18                                       | 23                          |
| <b>Total</b>  | <b>94</b>                  |                  | <b>226</b>                 |                  | <b>320</b>                               | <b>420</b>                  |

\*The two inflows were maintained to mimicked the gastric secretions and dilution of food in the human stomach fed a solid meal, adapted from Malagelada et al., (1976).

Malagelada J-R, Longstreth GF, Summerskill WHJ, Go VLW. Measurement of gastric functions during digestion of ordinary solid meals in Man. *Gastroenterology*, 1976, **70**(2), 203-10.

**Supplementary Table 2.** Inclusion list for parallel reaction monitoring.

| Peptide ID | Mass<br>( <i>m/z</i> ) | CS<br>[ <i>z</i> ] | Polarity | Start<br>(min) | End<br>(min) | NCE |
|------------|------------------------|--------------------|----------|----------------|--------------|-----|
| P7         | 808.8944               | 2                  | +        | 0.3            | 0.8          | 22  |
| P6         | 813.9051               | 2                  | +        | 0.3            | 0.8          | 22  |
| P8         | 1265.6046              | 2                  | +        | 2.2            | 2.9          | 16  |
| P9         | 1164.9482              | 3                  | +        | 2.8            | 3.9          | 16  |
| P1         | 784.9270               | 2                  | +        | 4.2            | 4.6          | 15  |
| P1H        | 787.9303               | 2                  | +        | 4.2            | 4.6          | 15  |
| P3         | 1032.5437              | 3                  | +        | 4.45           | 4.8          | 15  |
| P2         | 1132.0989              | 2                  | +        | 4.5            | 4.85         | 16  |
| P4         | 1029.5433              | 3                  | +        | 4.65           | 5.05         | 14  |
| P5         | 1304.0170              | 3                  | +        | 4.85           | 5.2          | 15  |

Order of list based on their relative retention time.

P1, LQLQFPQPQLPY; P2, LQLQFPQPQLPYQPQPF; P3, LQLQFPQPQLPYQPQLPYQPQPF; P4, LQLQFPQPQLPYQPQLPYQPQPF; P5, LQLQFPQPQLPYQPQLPYQPQLPYQPQPF (33-mer); P6, RPQQYPQPQPQY; P7, RPQQYPQSQPQY; P8, FQPSQQNPQAQGSFQPQQLPQF; P9, VRVPVQLQPQNPSQQQPQEQVPLVQQQF.

**Supplementary Table 3.** Trace finder peptide quantitation ions settings.

| Peptide ID | Mass<br>( <i>m/z</i> ) | Target Peak 1 | Confirming<br>peak (T1C1) | Target peak 2 |
|------------|------------------------|---------------|---------------------------|---------------|
| P7         | 808.8944               | 1210.5965     | 1182.5973                 | 407.1925      |
| P6         | 813.9051               | 1220.6172     | 1192.6212                 | 407.1925      |
| P8         | 1265.6046              | 2141.0195     | 857.4502                  | 391.1969      |
| P9         | 1164.9482              | 1254.1615     | 1017.6191                 | 987.5244      |
| P1         | 784.9270               | 1290.7208     | 617.3293                  | 279.1341      |
| P1H        | 787.9303               | 1293.7296     | 618.3329                  | 279.1341      |
| P3         | 1032.5437              | 1417.7468     | 1305.1910                 | 263.1391      |
| P2         | 1132.0989              | 2002.0605     | 713.3612                  | 488.2505      |
| P4         | 1029.5433              | 713.3608      | 1550.8344                 | 263.1389      |
| P5         | 1304.0170              | 713.3613      | 2374.2735                 | 263.1390      |

Order of list based on their relative retention time.

**Supplementary Table 4:** Gastric emptying (GE) rates at different digestion times.

| Time | GE, % |
|------|-------|
| 10   | 7.1   |
| 20   | 22.9  |
| 30   | 35.7  |
| 60   | 59.3  |
| 90   | 77.6  |
| 120  | 85.5  |
| 150  | 88.5  |

Adapted from (Malagelada, 1977; Malagelada, Longstreth, Summerskill, & Go, 1976).

Malagelada, J.-R. (1977). Quantification of Gastric Solid-Liquid Discrimination During Digestion of Ordinary Meals. *Gastroenterology*, 72(6), 1264-1267. doi:10.1016/S0016-5085(77)80024-3

Malagelada, J.-R., Longstreth, G. F., Summerskill, W. H. J., & Go, V. L. W. (1976). Measurement of Gastric Functions During Digestion of Ordinary Solid Meals in Man. *Gastroenterology*, 70(2), 203-210. doi:10.1016/S0016-5085(76)80010-8

## Calculation 1. Example of the calculation used to determine the free amino groups present in the small intestine

The calculation of the amount of free amino groups present in the small intestine at 30 min is used as an example to show how the observed data in this study and the gastric emptying values in Supplementary Table 3 were used in the calculation.

Based on Figure 1, the amount of free amino groups present in the small intestine at 30 min are the free amino groups in the 10 min gastric and 20 min small intestinal digested sample and free amino groups in the 20 min gastric and 10 min small intestinal digested sample.

The free amino groups of each sample were calculated using the equation described in Calculations of Materials and Methods, and the following information was obtained:

- Amount of free amino groups in the 10 min gastric and 20 min small intestinal digested sample was 5,603 µg/g of bread
- Amount of free amino groups in the 20 min gastric and 10 min small intestinal digested sample was 5,794 µg/g of bread
- The gastric emptying at 10 min 7.1% (GE<sub>10</sub>)
- The gastric emptying at 20 min 22.9% (GE<sub>20</sub>)

The calculation was done based on one gram of bread (DM).

Amount of bread (mg) released from the stomach at 0-10 min

$$1,000 \times \frac{GE_{10}}{100}$$

$$1,000 \times \frac{7.1}{100} = 71.0$$

Amount of bread (mg) released from the stomach at 10-20 min

$$1,000 \times \frac{GE_{20} - GE_{10}}{100}$$

$$1,000 \times \frac{(22.9 - 7.1)}{100} = 158.8$$

Amount of free amino groups present in the bread released from the stomach at 10 min

$$= 0.071 \text{ g} \times 5,603 \text{ µg/g of bread} = 397.81 \text{ µg/g of bread}$$

Amount of free amino groups present in the bread released from the stomach at 20 min

$$= 0.158 \text{ g} \times 5,794 \text{ µg/g of bread} = 915.45 \text{ µg/g of bread}$$

Total free amino groups present in the small intestine at 30 min

$$= 397.81 + 915.45 = 1,313.26 \text{ } \mu\text{g/g of bread}$$

The same equations were used to determine the amount of epitopes in the small intestine at 30 min.

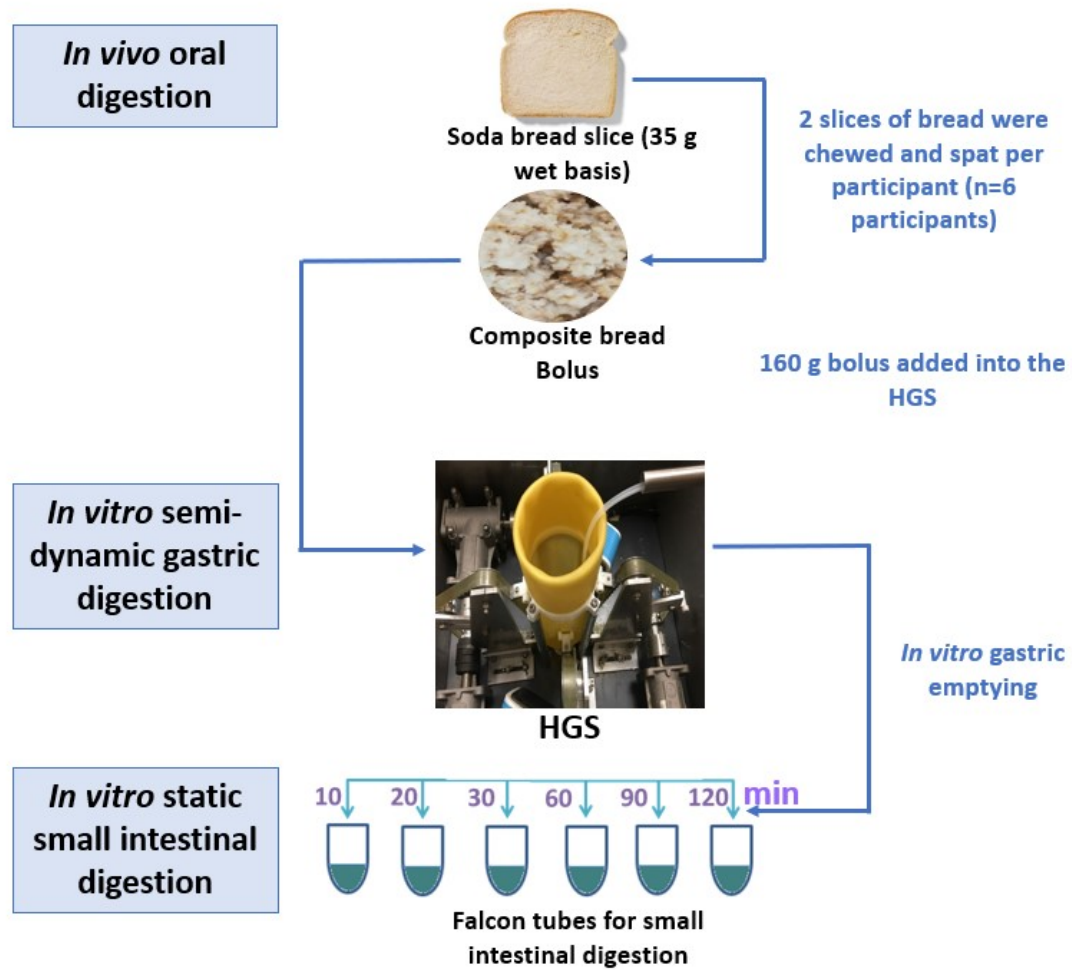

**Supplementary Figure 1.** Graphical illustration of dynamic *in vivo* and *in vitro* gastrointestinal digestion conducted during the experiment.

HGS, human gastric simulator
