# Supplementary material for: Rapid proteolysis of gluten-derived immunogenic peptides in bread by actinidin in a combined in vivo and in vitro oro-gastrointestinal digestion model
Source: Royal Society of Chemistry journal article supplement (doi:10.1039/d1fo03740d), 2022-01-01
Supplement: d1fo03740d2.xlsx [file d1fo03740d2.xlsx]

## Sheet: 10 min gastric with Actinidin
Peptide profiles of the gastric samples digested with actinidin at 10 min
Checked	Confidence	Sequence	Immunogenic or not	Protein	# Protein Groups	# Proteins	# PSMs	Master Protein Accessions	# Missed Cleavages	Theo. MH+ [Da]	Confidence (by Search Engine): Sequest HT	XCorr (by Search Engine): Sequest HT
FALSE	High	LQLQPFPQPQLPY	P1 - yes	Alpha gliadin	22	417	15	AFX69623.1; CAB76962.1; AKB95618.1; AFX69628.1; AGO17677.1; AGI15857.1; ABQ52117.1; AKC91275.1; AFQ13464.1; ABS72147.1; AKC91168.1; APU92640.1; ABS72157.1; ABQ52126.1; APU92346.1; APU92435.1; APU92643.1; APU92449.1; AHN85628.1; AKC91245.1; APU92653.1; APU92629.1	0	1568.85	High	3.92
FALSE	High	LQLQPFPQPQLPYPQPQPF	P2 - yes	Alpha gliadin	2	46	12	ABQ52126.1; APU92435.1	0	2263.19	High	4.72
FALSE	High	LQLQPFPQPQLPYPQPHLPYPQPQPF	P3 - yes	Alpha gliadin	3	18	29	AKC91275.1; AFQ13464.1; APU92643.1	0	3095.61	High	5.75
FALSE	High	LQLQPFPQPQLPYPQPQLPYPQPQPF	P4 - yes	Alpha gliadin	1	25	1	ABS72157.1	0	3086.61	High	4.99
FALSE	High	LQLQPFPQPQLPYPQPQLPYPQPQLPYPQPQPF	P5 - yes	Alpha gliadin	3	27	10	AFX69628.1; ABQ52117.1; APU92449.1	0	3910.04	High	5.29
FALSE	High	RPQQPYPQPQPQY	P6 - yes	Alpha gliadin	26	413	6	AFX69623.1; AKB95610.1; CAB76962.1; AKB95618.1; AGO17677.1; APU92650.1; AGI15857.1; ABS72158.1; AKC91275.1; AFQ13464.1; ABS72147.1; AKC91168.1; ABQ45317.1; APU92640.1; ABS72157.1; ABQ52126.1; APU92346.1; APU92435.1; APU92643.1; AHN85628.1; APU92577.1; AKC91245.1; AKC91157.1; APU92653.1; APU92629.1; APU92574.1	0	1626.8	High	3.71
FALSE	High	RPQQPYPQSQPQY	P7 - yes	Alpha gliadin	3	28	2	AFX69628.1; ABQ52117.1; APU92449.1	0	1616.78	High	3.37
FALSE	High	VRVPVPQLQPQNPSQQQPQEQVPLVQQQQF	P9 - yes	Alpha gliadin	18	372	3	AWK59783.1; SCW25765.1; APU92675.1; AFX69628.1; AGI15857.1; AAY45933.1; ABB92632.1; ABQ52117.1; AKC91135.1; APU92643.1; APU92676.1; ATL17024.1; SCW25759.1; AFX69590.1; ATL17025.1; AKC91120.1; AHN85630.1; APU92521.1	0	3492.83	High	6.36
FALSE	High	IFWGIPALLKR	No		2	34	143	AEO45112.2; ABX89297.1	0	1313.81	High	3.27
FALSE	High	IFWGIPALLR	No		2	52	40	AHC72166.1; CAE00601.1	0	1185.71	High	2.66
FALSE	High	LPWSTGLQMR	No		4	90	10	ABX64443.1; AWM72943.1; ABX89296.1; AGZ95069.1	0	1188.62	High	3.02
FALSE	High	FASIVAGIGGQ	No		1	1	18	P08453.1	0	1019.55	High	3.88
FALSE	High	GTSSQTVQGYYPGVTSPR	No		1	10	19	ABX89296.1	0	1884.91	High	5.28
FALSE	High	APFASIVAGIGGQ	No		1	1	29	P08453.1	0	1187.64	High	4.56
FALSE	High	LQPHQIAQLEVMNSIALR	No		1	8	12	ACY08811.1	0	2077.12	High	7.42
FALSE	High	SHIPGLERPSQQQPLPPQQTL	No		2	35	37	ACA63856.1; ACA63852.1	0	2351.25	High	4.53
FALSE	High	SHIPGLERPSQQQPLPPQQTLSHHQQQQPIQQQPQPF	No		1	4	20	ACA63856.1	0	4288.18	High	7.87
FALSE	High	SSYHVSVEHQAASLK	No		2	22	11	AEO45112.2; ABX89297.1	0	1642.82	High	6.59
FALSE	High	THGAFLQPHQIAQLEVMNSIALR	No		1	8	10	ACY08811.1	0	2590.36	High	7.42
FALSE	High	WGIPALLR	No		4	90	25	ABG68031.1; AHC72166.1; CAE00601.1; ADY38715.1	0	925.562	High	2.58
FALSE	High	WGTSSQTVQGYYPGVTSPR	No		1	10	14	ABX89296.1	0	2070.99	High	5.69
FALSE	High	YLTSPQQLGQGQQPR	No		2	37	37	ABG68031.1; ADY38715.1	0	1700.87	High	4
FALSE	High	YYPTSPQLSGQGQRPGQW	No		2	20	42	AEO45112.2; ABX89297.1	0	2049.98	High	5.16
FALSE	High	IGQQQPFPPQQPYPQPQPFPSQQPY	Yes	Alpha gliadin /LMW glutenin	14	255	60	AKB95610.1; AGO17677.1; AKC91275.1; AFF27488.1; AFN08646.1; ABS72147.1; AKC91168.1; AWK59799.1; APU92346.1; APU92643.1; APU92577.1; AKC91245.1; APU92653.1; APU92574.1	0	2922.42	High	5.38
FALSE	High	LGQQQQQFPGQQQPFPPQQPYPQPQPF	Yes	Alpha gliadin	2	8	10	ATL17027.1; ATL17024.1	0	3163.54	High	5.27
FALSE	High	AIVYSIILQQQQQQQQQQQQR	Yes	Alpha gliadin	2	4	15	ACY08811.1; ABX84154.1	0	2584.36	High	6.71
FALSE	High	GQQGYYPTSLQQPGQGQQGYYPTSLQHTGQR	Yes	High molecular weight glutenin	1	8	13	P10387.1	0	3453.62	High	8.36
FALSE	High	LQLQPFPQPQPFPPQLPYPQPQ	Yes	Alpha gliadin	2	47	22	ABS72158.1; APU92676.1	0	2585.36	High	4.86
FALSE	High	QPFPQQPQQPYPQQPQQPFPQTQQPQQPFPQSK	Yes	Alpha gliadin /LMW glutenin	1	1	14	P06659.1	0	3927.92	High	7.74
FALSE	High	RPQQPYPQSQPQYSQPQQPISQQQQQQQQQQKQ	Yes	Alpha gliadin	1	1	21	ABQ52117.1	0	4018.95	High	10.47
FALSE	High	RPQQPYPQSQPQYSQPQQPISQQQQQQQQQQKQQ	Yes	Alpha gliadin	1	1	11	ABQ52117.1	0	4147.01	High	9.51
FALSE	High	SSSLQQPGQGLQGHYPASLQQPGQGHPGQR	Yes	High molecular weight glutenin	1	7	21	AGZ95069.1	0	3125.53	High	6.79
FALSE	High	TASLQQPGQGQQGHYPASLQQVGQGQQIGQLGQR	Yes	High molecular weight glutenin	1	11	16	AGZ95069.1	0	3573.79	High	8.17
FALSE	High	VLPQQPPFSQQQQPVLPPQQSPFPQQQQHQQL	Yes	Low molecular weight glutenin	2	49	13	AAP87371.1; ACC60298.1	0	3730.91	High	6.87
FALSE	High	VPVPQLQPQNPSQQQPQK	Yes	Alpha gliadin	3	49	23	AWK59799.1; AKC91134.1; AKC91157.1	0	2041.08	High	5.18
FALSE	High	VQQQQFIGQQQPFPPQQPYPQPQPFPSQQPY	Yes	Alpha gliadin	8	235	10	AKB95610.1; APU92675.1; AKC91129.1; APU92643.1; AKC91120.1; AKC91124.1; APU92653.1; AFF27487.1	0	3680.79	High	6.31
FALSE	High	VQQQQFPGQQQPFPPQQPYPQPQPFPSQQPY	Yes	Alpha gliadin	5	86	12	AWK59783.1; AFX69628.1; ABQ52117.1; ABS72157.1; AHN85628.1	0	3664.76	High	5.24
FALSE	High	VRVPVPQLQ	Yes	Alpha gliadin	36	649	10	AFX69623.1; AWK59783.1; AKB95610.1; AMS25599.1; CAB76962.1; AKB95618.1; QDD55736.1; AFX69628.1; AGO17677.1; APU92650.1; AGI15857.1; ADA83695.1; ABQ52117.1; AKC91275.1; AFF27488.1; ATL17027.1; AFQ13464.1; AFN08646.1; AKC91182.1; AKC91168.1; QDD55735.1; ABS72157.1; ABQ52126.1; APU92346.1; APU92435.1; APU92643.1; APU92449.1; AHN85628.1; APU92577.1; APU92676.1; AKC91134.1; ATL17024.1; APU92677.1; SCW…	0	1035.63	High	2.68
FALSE	High	VRVPVPQLQLQN	Yes	Alpha gliadin	1	36	17	ABQ52126.1	0	1390.82	High	3.61
FALSE	High	VRVPVPQLQPQN	Yes	Alpha gliadin	33	586	59	AWK59783.1; AKB95610.1; AMS25599.1; CAB76962.1; AKB95618.1; AFX69628.1; AGO17677.1; APU92650.1; AGI15857.1; ADA83695.1; ABQ52117.1; AKC91275.1; AFF27488.1; ATL17027.1; AFQ13464.1; AFN08646.1; AKC91182.1; AKC91168.1; QDD55735.1; ABS72157.1; APU92346.1; APU92435.1; APU92643.1; APU92449.1; AHN85628.1; APU92577.1; APU92676.1; AKC91134.1; ATL17024.1; APU92677.1; SCW25759.1; AKC91157.1; APU92574.1	0	1374.79	High	3.2
FALSE	High	VRVPVPQLQPQNPSQ	Yes	Alpha gliadin	32	573	10	AWK59783.1; AKB95610.1; AMS25599.1; CAB76962.1; AKB95618.1; AFX69628.1; AGO17677.1; AGI15857.1; ADA83695.1; ABQ52117.1; AKC91275.1; AFF27488.1; ATL17027.1; AFQ13464.1; AFN08646.1; AKC91182.1; AKC91168.1; QDD55735.1; ABS72157.1; APU92346.1; APU92435.1; APU92643.1; APU92449.1; AHN85628.1; APU92577.1; APU92676.1; AKC91134.1; ATL17024.1; APU92677.1; SCW25759.1; AKC91157.1; APU92574.1	0	1686.93	High	4.44
FALSE	High	VRVPVPQLQPQNPSQQQPQEQVPL	Yes	Alpha gliadin	23	447	37	AWK59783.1; AMS25599.1; AFX69628.1; AGO17677.1; AGI15857.1; ABQ52117.1; ATL17027.1; AFQ13464.1; AKC91182.1; AKC91168.1; QDD55735.1; ABS72157.1; APU92346.1; APU92435.1; APU92643.1; APU92449.1; AHN85628.1; APU92577.1; APU92676.1; ATL17024.1; APU92677.1; SCW25759.1; APU92574.1	0	2734.46	High	6.32
FALSE	High	VRVPVPQLQPQNPSQQQPQK	Yes	Alpha gliadin	2	47	30	AKC91134.1; AKC91157.1	0	2296.25	High	6.19
FALSE	High	VTVPVPQLQPQNPSQQQPQK	Yes	Alpha gliadin	1	2	13	AWK59799.1	0	2241.2	High	4.15
FALSE	High	YSSSLQQPGQGLQGHYPASLQQPGQGHPGQR	Yes	High molecular weight glutenin	1	7	14	AGZ95069.1	0	3288.59	High	7.04
FALSE	High	YYPTSLQQPGQGQQIGK	Yes	High molecular weight glutenin	2	27	42	ABX64443.1; ABX89296.1	0	1892.95	High	4.23
FALSE	High	YYPTSSQQPGQLQQLAQGQQGQQPER	Yes	High molecular weight glutenin	2	21	11	ABG68031.1; ADY38715.1	0	2945.41	High	5.8

## Sheet: 20 min gastric with Actinidin
Peptide profiles of the gastric samples digested with actinidin at 20 min
Checked	Confidence	Sequence	Immunogenic or not	Protein	# Protein Groups	# Proteins	# PSMs	Master Protein Accessions	# Missed Cleavages	Theo. MH+ [Da]	Confidence (by Search Engine): Sequest HT	XCorr (by Search Engine): Sequest HT
FALSE	High	LQLQPFPQPQLPY	P1 - yes	Alpha gliadin	22	417	16	AFX69623.1; CAB76962.1; AKB95618.1; AGI15857.1; AGI15856.1; AAY45933.1; ABQ52117.1; AKC91275.1; APU92334.1; AFQ13464.1; AKC91168.1; AKC91135.1; ABQ52126.1; APU92435.1; SCW25764.1; APU92449.1; AKC91120.1; AKC91124.1; APU92653.1; APU92629.1; APU92357.1; APU92521.1	0	1568.85	High	3.86
FALSE	High	LQLQPFPQPQLPYPQPQPF	P2 - yes	Alpha gliadin	3	46	16	AAY45933.1; ABQ52126.1; APU92435.1	0	2263.19	High	4.21
FALSE	High	LQLQPFPQPQLPYPQPHLPYPQPQPF	P3 - yes	Alpha gliadin	2	18	14	AKC91275.1; AFQ13464.1	0	3095.61	High	5.69
FALSE	High	LQLQPFPQPQLPYPQPQLPYPQPQPF	P4 - yes	Alpha gliadin	1	25	4	AKC91135.1	0	3086.61	High	5.58
FALSE	High	LQLQPFPQPQLPYPQPQLPYPQPQLPYPQPQPF	P5 - yes	Alpha gliadin	4	27	29	ABQ52117.1; SCW25764.1; APU92449.1; AKC91120.1	0	3910.04	High	5.59
FALSE	High	RPQQPYPQPQPQY	P6 - yes	Alpha gliadin	22	413	5	AFX69623.1; AKB95610.1; APU92571.1; CAB76962.1; AKB95618.1; APU92628.1; APU92650.1; AGI15857.1; AAY45933.1; AKC91275.1; APU92334.1; AFQ13464.1; AKC91168.1; AKC91135.1; ABQ52126.1; APU92435.1; APU92653.1; APU92629.1; AKC91175.1; APU92574.1; APU92357.1; APU92521.1	0	1626.8	High	3.49
FALSE	High	RPQQPYPQSQPQY	P7 - yes	Alpha gliadin	4	28	4	ABQ52117.1; SCW25764.1; APU92449.1; AKC91120.1	0	1616.78	High	3.72
FALSE	High	VRVPVPQLQPQNPSQQQPQEQVPLVQQQQF	P9 - yes	Alpha gliadin	20	372	4	AWK59783.1; APU92571.1; APU92628.1; AGI15857.1; AAY45933.1; ABQ52117.1; APU92334.1; AFQ13464.1; ADA83693.1; AKC91135.1; SCW25764.1; ATL17022.1; APU92676.1; ATL17024.1; APU92677.1; AKC91120.1; AKC91175.1; APU92574.1; APU92357.1; APU92521.1	0	3492.83	High	5.7
FALSE	High	APFASIVAGIGGQ	No		1	1	33	P08453.1	0	1187.64	High	4.56
FALSE	High	FASIVAGIGGQ	No		1	1	14	P08453.1	0	1019.55	High	3.85
FALSE	High	GTSSQTVQGYYPGVTSPR	No		1	10	16	P10387.1	0	1884.91	High	4.94
FALSE	High	IFWGIPALLKR	No		2	34	157	AEO45112.2; ABX89297.1	0	1313.81	High	3.18
FALSE	High	LQPHQIAQLEVMNSIALR	No		1	8	14	ACY08811.1	0	2061.13	High	6.73
FALSE	High	QPGYYPTSPWQPEQLQQPTQGQQR	No		1	23	11	ABG68031.1	0	2842.35	High	5.53
FALSE	High	SHHQQQQPIQQQPQPF	No		1	10	13	ACA63856.1	0	1955.95	High	5.15
FALSE	High	SHIPGLEKPSQQQPLPL	No		2	36	10	AEI00697.1; ALN96397.1	0	1869.02	High	3.56
FALSE	High	SHIPGLEKPSQQQPLPLQQTL	No		1	22	11	ALN96397.1	0	2339.27	High	4.9
FALSE	High	SHIPGLERPSQQQPLPPQQT	No		2	38	12	AFU48612.1; ACA63856.1	0	2238.16	High	3.66
FALSE	High	SHIPGLERPSQQQPLPPQQTL	No		2	35	39	AFU48612.1; ACA63856.1	0	2351.25	High	4.5
FALSE	High	SHIPGLERPSQQQPLPPQQTLSHHQQQQPIQQQPQPF	No		1	4	17	ACA63856.1	0	4288.18	High	7.82
FALSE	High	THGAFLQPHQIAQLEVMNSIALR	No		1	8	10	ACY08811.1	0	2574.36	High	8.73
FALSE	High	WGTSSQTVQGYYPGVTSPR	No		1	10	13	P10387.1	0	2070.99	High	5.88
FALSE	High	YLTSPQQLGQGQQPR	No		1	37	33	ABG68031.1	0	1700.87	High	4.25
FALSE	High	YYPTSPQLSGQGQRPGQW	No		2	20	56	AEO45112.2; ABX89297.1	0	2049.98	High	3.67
FALSE	High	AIVYSIILQQQQQQQQQQQQR	Yes	Alpha gliadin	2	4	13	ACY08811.1; ABX84154.1	0	2584.36	High	6.63
FALSE	High	FQPSQQNPQAQGSFQPQQLPQFEAIR	Yes	Alpha gliadin	1	26	10	APU92435.1	0	2999.48	High	5.91
FALSE	High	HYPASLQQPGQGQQGHY	Yes	High molecular weight glutenin	2	27	14	P10387.1; AGZ95069.1	0	1895.88	High	5.57
FALSE	High	IGQQQPFPPQQPYPQPQPFPSQQPY	Yes	Alpha gliadin /LMW glutenin	16	255	62	AKB95610.1; APU92628.1; AGI15856.1; AKC91275.1; APU92334.1; AFF27488.1; AFN08646.1; AKC91168.1; AWK59799.1; AKC91120.1; AKC91123.1; AKC91124.1; APU92653.1; AKC91175.1; APU92574.1; APU92357.1	0	2922.42	High	5.82
FALSE	High	LQLQPFPQPQPFPPQLPYPQPQ	Yes	Alpha gliadin	4	47	19	ADA83693.1; APU92676.1; AGO17669.1; AKC91123.1	0	2585.36	High	5.18
FALSE	High	LQQQLVPQLQQPL	Yes	Low molecular weight glutenin	1	1	18	P08453.1	0	1532.88	High	3.56
FALSE	High	QGSYYPGQASPQQPGQGQQPGK	Yes	High molecular weight glutenin	2	29	11	ABX64443.1; P10387.1	0	2288.07	High	6.11
FALSE	High	QPFPQQPQQPYPQQPQQPFPQTQQPQQPFPQSK	Yes	Alpha gliadin /LMW glutenin	1	1	12	P06659.1	0	3927.92	High	6.52
FALSE	High	QQGYYPTSPQQLGQGQQPR	Yes	Alpha gliadin	1	8	13	P10387.1	0	2161.04	High	4.88
FALSE	High	QQGYYPTSPQQPGQGQQLGQGQPGYYPTSQQPGQK	Yes	High molecular weight glutenin	1	25	14	AHC72166.1	0	3806.78	High	7.02
FALSE	High	RPQQPYPQSQPQYSQPQQPISQQQQQQQQQQKQ	Yes	Alpha gliadin	1	1	25	ABQ52117.1	0	4018.95	High	9.7
FALSE	High	RPQQPYPQSQPQYSQPQQPISQQQQQQQQQQKQQ	Yes	Alpha gliadin	1	1	20	ABQ52117.1	0	4147.01	High	9.74
FALSE	High	RPQQPYPQSQPQYSQPQQPISQQQQQQQQQQQK	Yes	Alpha gliadin	1	11	16	SCW25764.1	0	4018.95	High	7.08
FALSE	High	SLQQPGQGQQGHYPASLQQPGQGQPGQR	Yes	High molecular weight glutenin	2	18	14	ABX64443.1; P10387.1	0	2957.44	High	5.41
FALSE	High	SLQQPGQGQQIGQGQQGYYPTSPQHPGQR	Yes	High molecular weight glutenin	1	19	14	AGZ95069.1	0	3150.51	High	6.28
FALSE	High	SSSLQQPGQGLQGHYPASLQQPGQGHPGQR	Yes	High molecular weight glutenin	1	7	20	AGZ95069.1	0	3125.53	High	7.45
FALSE	High	TASLQQPGQGQQGHYPASLQQVGQGQQIGQLGQR	Yes	High molecular weight glutenin	1	11	14	AGZ95069.1	0	3573.79	High	6.95
FALSE	High	VPVPQLQPQNPSQQQPQK	Yes	Alpha gliadin	2	49	22	AWK59799.1; AKC91134.1	0	2041.08	High	4.74
FALSE	High	VQQQQFPGQQQPFPPQQPYPQPQPFPSQQPY	Yes	Alpha gliadin	5	86	20	AWK59783.1; APU92571.1; ABQ52117.1; AKC91135.1; SCW25764.1	0	3664.76	High	5.51
FALSE	High	VQQQQFPGQQQQFPPQQPYPQPQPFPSQQPY	Yes	Alpha gliadin	4	68	15	ADA83693.1; AGO17661.1; APU92676.1; AGO17669.1	0	3695.77	High	6.07
FALSE	High	VRFPVPQLQPQNPSQQQPQEQVPL	Yes	Alpha gliadin	1	22	15	AKC91270.1	0	2782.46	High	4.88
FALSE	High	VRVPVPQLQPQN	Yes	Alpha gliadin	38	586	43	AWK59783.1; AKB95610.1; AMS25609.1; APU92571.1; CAB76962.1; AKB95618.1; APU92628.1; AWK59801.1; APU92650.1; AGI15857.1; AGI15856.1; AAY45933.1; ADA83695.1; ABQ52117.1; AKC91275.1; APU92334.1; AFF27488.1; AFQ13464.1; AFN08646.1; ADA83693.1; AKC91168.1; AKC91135.1; APU92435.1; SCW25764.1; ATL17022.1; APU92449.1; APU92676.1; AKC91134.1; ATL17024.1; APU92677.1; AKC91120.1; AGO17669.1; AKC91123.1; AKC…	0	1374.79	High	3.11
FALSE	High	VRVPVPQLQPQNPSQQ	Yes	Alpha gliadin	35	572	11	AWK59783.1; AKB95610.1; AMS25609.1; APU92571.1; CAB76962.1; AKB95618.1; APU92628.1; AGI15857.1; AGI15856.1; AAY45933.1; ADA83695.1; ABQ52117.1; AKC91275.1; APU92334.1; AFF27488.1; AFQ13464.1; AFN08646.1; ADA83693.1; AKC91168.1; AKC91135.1; APU92435.1; SCW25764.1; ATL17022.1; APU92449.1; APU92676.1; AKC91134.1; ATL17024.1; APU92677.1; AKC91120.1; AGO17669.1; AKC91123.1; AKC91175.1; APU92574.1; APU…	0	1814.99	High	4.92
FALSE	High	VRVPVPQLQPQNPSQQQPQEQVPL	Yes	Alpha gliadin	23	447	50	AWK59783.1; APU92571.1; APU92628.1; AGI15857.1; AAY45933.1; ABQ52117.1; APU92334.1; AFQ13464.1; ADA83693.1; AKC91168.1; AKC91135.1; APU92435.1; SCW25764.1; ATL17022.1; APU92449.1; APU92676.1; ATL17024.1; APU92677.1; AKC91120.1; AKC91175.1; APU92574.1; APU92357.1; APU92521.1	0	2734.46	High	5.33
FALSE	High	VRVPVPQLQPQNPSQQQPQK	Yes	Alpha gliadin	1	47	31	AKC91134.1	0	2296.25	High	5.36
FALSE	High	VTVPVPQLQPQNPSQQQPQK	Yes	Alpha gliadin	1	2	15	AWK59799.1	0	2241.2	High	4.18
FALSE	High	VYYPTSPQQSGQGQQGYYPTSPQQSGQGQQPGQGQQPR	Yes	High molecular weight glutenin	1	4	11	AHC72166.1	0	4122.89	High	6.98
FALSE	High	YSSSLQQPGQGLQGHYPASLQQPGQGHPGQR	Yes	High molecular weight glutenin	1	7	17	AGZ95069.1	0	3288.59	High	7.87
FALSE	High	YYPTSLQQPGQGQQIGK	Yes	High molecular weight glutenin	2	27	34	ABX64443.1; P10387.1	0	1892.95	High	4.56

## Sheet: 60 min gastric with Actinidin
Peptide profiles of the gastric samples digested with actinidin at 60 min
Checked	Confidence	Sequence	Immunogenic or not	Protein	# Protein Groups	# Proteins	# PSMs	Master Protein Accessions	# Missed Cleavages	Theo. MH+ [Da]	Confidence (by Search Engine): Sequest HT	XCorr (by Search Engine): Sequest HT
FALSE	High	LQLQPFPQPQLPY	P1 - yes	Alpha gliadin	22	417	19	AKC91202.1; CAB76962.1; AKB95618.1; APU92558.1; AFX69628.1; AGO17677.1; AAY45933.1; AFH74440.1; ABQ52117.1; AKC91275.1; AGO17673.1; AFQ13464.1; AFX69618.1; ABS72157.1; AFX69586.1; APU92303.1; APU92435.1; AKC91283.1; APU92643.1; APU92449.1; APU92629.1; SCW25722.1	0	1568.85	High	3.86
FALSE	High	LQLQPFPQPQLPYPQPQPF	P2 - yes	Alpha gliadin	3	46	10	AAY45933.1; AFX69586.1; APU92435.1	0	2263.19	High	5.16
FALSE	High	LQLQPFPQPQLPYPQPHLPYPQPQPF	P3 - yes	Alpha gliadin	3	18	11	AKC91275.1; AFQ13464.1; APU92643.1	0	3095.61	High	4.37
FALSE	High	LQLQPFPQPQLPYPQPQLPYPQPQPF	P4 - yes	Alpha gliadin	1	25	2	ABS72157.1	0	3086.61	High	5.05
FALSE	High	LQLQPFPQPQLPYPQPQLPYPQPQLPYPQPQPF	P5 - yes	Alpha gliadin	4	27	24	AFX69628.1; ABQ52117.1; AFX69618.1; APU92449.1	0	3910.04	High	5.54
FALSE	High	RPQQPYPQPQPQY	P6 - yes	Alpha gliadin	23	413	5	AKB95610.1; AKC91202.1; APU92571.1; CAB76962.1; AKB95618.1; APU92558.1; AGO17677.1; APU92650.1; AAY45933.1; AFH74440.1; AKC91275.1; AGO17673.1; AFQ13464.1; ABQ45317.1; ABS72157.1; AFX69586.1; APU92435.1; AKC91283.1; APU92643.1; APU92577.1; APU92629.1; SCW25722.1; AKC91175.1	0	1626.8	High	3.59
FALSE	High	RPQQPYPQSQPQY	P7 - yes	Alpha gliadin	4	28	2	AFX69628.1; ABQ52117.1; AFX69618.1; APU92449.1	0	1616.78	High	3.97
FALSE	High	VRVPVPQLQPQNPSQQQPQEQVPLVQQQQF	P9 - yes	Alpha gliadin	22	372	2	AWK59783.1; AKC91202.1; AFX69624.1; APU92571.1; APU92558.1; AFX69628.1; AGO17677.1; AAY45933.1; AFH74440.1; ABQ52117.1; AFQ13464.1; AKC91182.1; APU92564.1; ABS72157.1; AFX69586.1; ATL17022.1; APU92643.1; APU92577.1; APU92676.1; ATL17024.1; ABQ45320.1; AKC91175.1	0	3492.83	High	5.72
FALSE	High	AGQYEQQIVVPPK	No		2	28	10	AEO45112.2; ABG68042.1	0	1456.78	High	3.88
FALSE	High	APFASIVAGIGGQ	No		1	1	36	P08453.1	0	1187.64	High	4.28
FALSE	High	FASIVAGIGGQ	No		1	1	15	P08453.1	0	1019.55	High	3.33
FALSE	High	GLERPSQQQPLPPQQTL	No		1	36	14	ACA63856.1	0	1917.02	High	3.55
FALSE	High	GTSSQTVQGYYPGVTSPR	No		1	10	17	P10387.1	0	1884.91	High	5.23
FALSE	High	IFWGIPALLKR	No		2	34	125	AEO45112.2; ABG68042.1	0	1313.81	High	3.83
FALSE	High	IFWGIPALLR	No		2	52	22	AHC72166.1; AFC75699.1	0	1185.71	High	2.79
FALSE	High	LQPHQIAQLEVMNSIALR	No		2	8	12	AGK83327.1; ACY08811.1	0	2077.12	High	7.12
FALSE	High	LQPHQIAQLEVMTSIALR	No		10	301	10	P04730.1; AAP87371.1; AQZ22276.1; ABY58133.1; QKX46021.1; AGK83237.1; ALN96402.1; ABY58135.1; ACA63856.1; AEI00683.1	0	2048.13	High	7.53
FALSE	High	LTSPQQLGQGQQPR	No		2	37	11	ABG68031.1; ADY38701.1	0	1537.81	High	3.76
FALSE	High	SHIPGLEKPSQQQPLPL	No		3	36	10	ABY58133.1; ALN96402.1; ABY58135.1	0	1869.02	High	3.2
FALSE	High	SHIPGLERPSQQQPLPPQQT	No		1	38	13	ACA63856.1	0	2238.16	High	3.37
FALSE	High	SHIPGLERPSQQQPLPPQQTL	No		1	35	42	ACA63856.1	0	2351.25	High	4.72
FALSE	High	SHIPGLERPSQQQPLPPQQTLSHHQQQQPIQQQPQPF	No		1	4	12	ACA63856.1	0	4288.18	High	6.6
FALSE	High	THGAFLQPHQIAQLEVMNSIALR	No		2	8	12	AGK83327.1; ACY08811.1	0	2574.36	High	8.47
FALSE	High	VVSPVAGQYEQQIVVPPK	No		2	28	10	AEO45112.2; ABG68042.1	0	1938.07	High	4.93
FALSE	High	WGIPALLR	No		4	90	12	ABG68031.1; AHC72166.1; AFC75699.1; ADY38701.1	0	925.562	High	2.54
FALSE	High	YLTSPQQLGQGQQPR	No		2	37	38	ABG68031.1; ADY38701.1	0	1700.87	High	4.43
FALSE	High	YPTSPQQLGQGQQPR	No		1	8	10	P10387.1	0	1684.84	High	4.84
FALSE	High	YYPTSPQLSGQGQR	No		2	21	10	AEO45112.2; ABG68042.1	0	1581.77	High	3.48
FALSE	High	YYPTSPQLSGQGQRPGQW	No		2	20	55	AEO45112.2; ABG68042.1	0	2049.98	High	4.42
FALSE	High	AIVYSIILQQQQQQQQQQQQR	Yes	Alpha gliadin	1	4	13	ACY08811.1	0	2584.36	High	7.18
FALSE	High	FIGQQQPFPPQQPYPQPQPFPSQQPY	Yes	Alpha gliadin	14	252	16	AKB95610.1; AKC91202.1; APU92558.1; AGO17677.1; AFH74440.1; AKC91275.1; AGO17673.1; AFF27488.1; APU92564.1; AWK59799.1; APU92303.1; APU92643.1; APU92577.1; AKC91175.1	0	3069.49	High	5.65
FALSE	High	FQPSQQNPQAQGSFQPQQLPQFEAIR	Yes	Alpha gliadin	1	26	11	APU92435.1	0	2999.48	High	6.44
FALSE	High	IGQQQPFPPQQPYPQPQPFPSQQPY	Yes	Alpha gliadin /LMW glutenin	14	255	64	AKB95610.1; AKC91202.1; APU92558.1; AGO17677.1; AFH74440.1; AKC91275.1; AGO17673.1; AFF27488.1; APU92564.1; AWK59799.1; APU92303.1; APU92643.1; APU92577.1; AKC91175.1	0	2922.42	High	5.32
FALSE	High	LGQQQQQFPGQQQPFPPQQPYPQPQPF	Yes	Alpha gliadin	2	8	11	ATL17022.1; ATL17024.1	0	3163.54	High	5.02
FALSE	High	LQLQPFPQPQPFPPQLPYPQPQ	Yes	Alpha gliadin	2	47	20	APU92676.1; ABQ45320.1	0	2585.36	High	4.91
FALSE	High	QQGYYPTSPQQLGQGQQPR	Yes	Alpha gliadin	1	8	13	P10387.1	0	2161.04	High	5.32
FALSE	High	QQGYYPTSPQQPGQGQQLGQGQPGYYPTSQQPGQK	Yes	High molecular weight glutenin	2	25	11	AHC72166.1; AFC75699.1	0	3806.78	High	7.06
FALSE	High	RPQQPYPQSQPQYSQPQQPISQQQQQQQQQQKQ	Yes	Alpha gliadin	1	1	20	ABQ52117.1	0	4018.95	High	9.41
FALSE	High	RPQQPYPQSQPQYSQPQQPISQQQQQQQQQQKQQ	Yes	Alpha gliadin	1	1	15	ABQ52117.1	0	4147.01	High	8.9
FALSE	High	SLQQPGQGQQGHYPASLQQPGQGQPGQR	Yes	High molecular weight glutenin	2	18	12	ABX64443.1; P10387.1	0	2957.44	High	5.64
FALSE	High	SLQQPGQGQQIGQGQQGYYPTSPQHPGQR	Yes	High molecular weight glutenin	1	19	14	AGZ95069.1	0	3150.51	High	6.29
FALSE	High	SSSLQQPGQGLQGHYPASLQQPGQGHPGQR	Yes	High molecular weight glutenin	1	7	11	AGZ95069.1	0	3125.53	High	7.15
FALSE	High	VPVPQLQPQNPSQQQPQK	Yes	Alpha gliadin	3	49	21	AWK59799.1; AKC91283.1; SCW25760.1	0	2041.08	High	5.09
FALSE	High	VQQQQFPGQQQPFPPQQPYPQPQPFPSQQPY	Yes	Alpha gliadin	7	86	15	AWK59783.1; APU92571.1; AFX69628.1; ABQ52117.1; AFX69618.1; ABS72157.1; AFX69586.1	0	3664.76	High	5.08
FALSE	High	VRVPVPQLQPQN	Yes	Alpha gliadin	35	586	37	AWK59783.1; AKB95610.1; AKC91202.1; AFX69624.1; APU92571.1; CAB76962.1; AKB95618.1; APU92558.1; AFX69628.1; AGO17677.1; APU92650.1; AAY45933.1; ADA83695.1; AFH74440.1; ABQ52117.1; AKC91275.1; AFF27488.1; AFQ13464.1; AKC91182.1; APU92564.1; ABS72157.1; AFX69586.1; APU92435.1; ATL17022.1; AKC91283.1; APU92643.1; APU92449.1; APU92577.1; AKC91161.1; APU92676.1; SCW25760.1; ATL17024.1; ABQ45320.1; AKC…	0	1374.79	High	3.1
FALSE	High	VRVPVPQLQPQNPSQQQPQEQVPL	Yes	Alpha gliadin	25	447	28	AWK59783.1; AKC91202.1; AFX69624.1; APU92571.1; APU92558.1; AFX69628.1; AGO17677.1; AAY45933.1; AFH74440.1; ABQ52117.1; AFQ13464.1; AKC91182.1; APU92564.1; ABS72157.1; AFX69586.1; APU92435.1; ATL17022.1; APU92643.1; APU92449.1; APU92577.1; AKC91161.1; APU92676.1; ATL17024.1; ABQ45320.1; AKC91175.1	0	2734.46	High	5.22
FALSE	High	VRVPVPQLQPQNPSQQQPQK	Yes	Alpha gliadin	2	47	24	AKC91283.1; SCW25760.1	0	2296.25	High	5.14
FALSE	High	VTVPVPQLQPQNPSQQQPQK	Yes	Alpha gliadin	1	2	14	AWK59799.1	0	2241.2	High	4
FALSE	High	YLTSPQQSGQGQQPGQLQQSAQGQK	Yes	High molecular weight glutenin	2	22	12	AEO45112.2; ABG68042.1	0	2672.3	High	6.78
FALSE	High	YSSSLQQPGQGLQGHYPASLQQPGQGHPGQR	Yes	High molecular weight glutenin	1	7	15	AGZ95069.1	0	3288.59	High	6.21
FALSE	High	YYPTSLQQPGQGQQIGK	Yes	High molecular weight glutenin	2	27	35	ABX64443.1; P10387.1	0	1892.95	High	4.31

## Sheet: 10 min gastric No Actinidin
Peptide profiles of the gastric samples digested without actinidin at 10 min
Checked	Confidence	Sequence	Immunogenic or not	Protein	# Protein Groups	# Proteins	# PSMs	Master Protein Accessions	# Missed Cleavages	Theo. MH+ [Da]	Confidence (by Search Engine): Sequest HT	XCorr (by Search Engine): Sequest HT
FALSE	High	LQLQPFPQPQLPY	P1 - yes	Alpha gliadin	24	417	34	AFX69623.1; AKC91155.1; CAB76962.1; AKB95618.1; APU92384.1; AKC91171.1; AGI15857.1; APU92461.1; ABQ52117.1; AGO17673.1; AKC91168.1; ABS72157.1; ABQ52126.1; AFX69586.1; AFX69577.1; APU92435.1; SCW25764.1; AKC91283.1; APU92643.1; APU92449.1; AKC91120.1; AKC91124.1; SCW25722.1; APU92357.1	0	1568.85	High	3.32
FALSE	High	LQLQPFPQPQLPYPQPQPF	P2 - yes	Alpha gliadin	3	46	21	ABQ52126.1; AFX69586.1; APU92435.1	0	2263.19	High	4.85
FALSE	High	LQLQPFPQPQLPYPQPHLPYPQPQPF	P3 - yes	Alpha gliadin	1	18	25	APU92643.1	0	3095.61	High	4.93
FALSE	High	LQLQPFPQPQLPYPQPQLPYPQPQPF	P4 - yes	Alpha gliadin	2	25	4	AKC91155.1; ABS72157.1	0	3086.61	High	5.54
FALSE	High	LQLQPFPQPQLPYPQPQLPYPQPQLPYPQPQPF	P5 - yes	Alpha gliadin	4	27	53	ABQ52117.1; SCW25764.1; APU92449.1; AKC91120.1	0	3910.04	High	6
FALSE	High	RPQQPYPQPQPQY	P6 - yes	Alpha gliadin	24	413	4	AFX69623.1; AKB95610.1; AKC91155.1; APU92571.1; CAB76962.1; AKB95618.1; APU92384.1; AKC91171.1; APU92628.1; APU92650.1; AGI15857.1; APU92461.1; AGO17673.1; AKC91168.1; ABQ45317.1; ABS72157.1; ABQ52126.1; AFX69586.1; AFX69577.1; APU92435.1; AKC91283.1; APU92643.1; SCW25722.1; APU92357.1	0	1626.8	High	3.76
FALSE	High	VRVPVPQLQPQNPSQQQPQEQVPLVQQQQF	P9 -yes	Alpha gliadin	19	372	6	AWK59783.1; AKC91155.1; APU92571.1; AKC91171.1; APU92628.1; AGI15857.1; APU92461.1; ABQ52117.1; APU92253.1; ABS72157.1; AGO17671.1; AFX69586.1; SCW25764.1; ATL17022.1; APU92643.1; APU92676.1; ATL17024.1; AKC91120.1; APU92357.1	0	3492.83	High	6.19
FALSE	High	APFASIVAGIGGQ	No		1	1	51	P08453.1	0	1187.64	High	4.19
FALSE	High	FASIVAGIGGQ	No		1	1	14	P08453.1	0	1019.55	High	2.79
FALSE	High	GTSSQTVQGYYPGVTSPR	No		1	10	10	P10387.1	0	1884.91	High	5.31
FALSE	High	GTSSQTVQGYYPGVTSPR	No		1	10	17	P10387.1	0	1884.91	High	4.71
FALSE	High	IFWGIPALLKR	No		2	34	18	AEO45112.2; ABX89297.1	0	1313.81	High	2.84
FALSE	High	LQPHQIAQLEVMNSIALR	No		1	8	16	ACY08811.1	0	2061.13	High	7.59
FALSE	High	LTSPQQLGQGQQPR	No		1	37	10	ABG68031.1	0	1537.81	High	3.7
FALSE	High	SHHQQQQPIQQQPQPF	No		1	10	10	ACA63856.1	0	1955.95	High	5.36
FALSE	High	SHIPGLEKPSQQQPLPL	No		2	36	10	ACY08822.1; ALN96402.1	0	1869.02	High	3.69
FALSE	High	SHIPGLEKPSQQQPLPLQQTL	No		1	22	13	ACY08822.1	0	2339.27	High	4.78
FALSE	High	SHIPGLERPSQQQPLPPQQT	No		3	38	13	AFU48612.1; CAA76890.1; ACA63856.1	0	2238.16	High	3.52
FALSE	High	SHIPGLERPSQQQPLPPQQTL	No		3	35	52	AFU48612.1; CAA76890.1; ACA63856.1	0	2351.25	High	4.49
FALSE	High	THGAFLQPHQIAQLEVMNSIALR	No		1	8	14	ACY08811.1	0	2574.36	High	8.07
FALSE	High	WGTSSQTVQGYYPGVTSPR	No		1	10	19	P10387.1	0	2070.99	High	5.62
FALSE	High	YLTSPQQLGQGQQPR	No		1	37	42	ABG68031.1	0	1700.87	High	3.53
FALSE	High	YYPTSPQLSGQGQR	No		2	21	17	AEO45112.2; ABX89297.1	0	1581.77	High	2.75
FALSE	High	YYPTSPQLSGQGQRPGQ	No		2	21	10	AEO45112.2; ABX89297.1	0	1863.9	High	4.77
FALSE	High	YYPTSPQLSGQGQRPGQW	No		2	20	73	AEO45112.2; ABX89297.1	0	2049.98	High	4.7
FALSE	High	FIGQQQPFPPQQPYPQPQPFPSQQPY	Yes	Alpha gliadin	13	252	16	AKB95610.1; APU92384.1; APU92628.1; APU92461.1; AGO17673.1; AFF27488.1; AKC91168.1; AWK59799.1; AFX69577.1; APU92643.1; AKC91120.1; AKC91124.1; APU92357.1	0	3069.49	High	4.81
FALSE	High	IGQQQPFPPQQPYPQPQPFPSQQPY	Yes	Alpha gliadin /LMW glutenin	13	255	110	AKB95610.1; APU92384.1; APU92628.1; APU92461.1; AGO17673.1; AFF27488.1; AKC91168.1; AWK59799.1; AFX69577.1; APU92643.1; AKC91120.1; AKC91124.1; APU92357.1	0	2922.42	High	5.76
FALSE	High	LGQQQPFPPQQPYPQLQPFPSQQPY	Yes	Alpha gliadin /LMW glutenin	1	7	10	AGI15857.1	0	2938.45	High	5.3
FALSE	High	LGQQQPFPPQQPYPQPQPFPSQLPY	Yes	Alpha gliadin /LMW glutenin	1	21	13	SCW25722.1	0	2907.45	High	6.37
FALSE	High	LGQQQQQFPGQQQPFPPQQPYPQPQPF	Yes	Alpha gliadin	2	8	30	ATL17022.1; ATL17024.1	0	3163.54	High	5.6
FALSE	High	LGQQQSFPPQQPYPQPQPFPSQQPY	Yes	Alpha gliadin /LMW glutenin	1	2	10	CAB76962.1	0	2912.4	High	5.2
FALSE	High	LQLQPFPQPQLSY	Yes	Alpha gliadin /LMW glutenin	1	13	13	AHY37813.1	0	1558.83	High	4
FALSE	High	LQLQPFPQPQPFPPQLPYPQPQ	Yes	Alpha gliadin	1	47	31	APU92676.1	0	2585.36	High	5.1
FALSE	High	LQQQLVPQLQQPL	Yes	Low molecular weight glutenin	1	1	10	P08453.1	0	1532.88	High	3.59
FALSE	High	QFPQQQFPQQQFPQQQF	Yes	Low molecular weight glutenin	1	2	10	CAR82267.1	0	2179.04	High	5.24
FALSE	High	QFPQQQLPQQQQIPQQQQIPQQPQQIPQQQQIPQQPK	Yes	Alpha gliadin/Low molecular weight glutenin	1	2	12	CAR82267.1	0	4453.31	High	4.82
FALSE	High	QGSYYPGQASPQQPGQGQQPGK	Yes	High molecular weight glutenin	2	29	11	P10387.1; P08488.1	0	2288.07	High	5.42
FALSE	High	QLVYYPTSPQQSGQGQQGYYPTSPQQSGQGQQPGQGQQPR	Yes	High molecular weight glutenin	1	3	15	AHC72166.1	0	4364.04	High	7.21
FALSE	High	QPFPQQPQQPYPQQPQQPFPQTQQPQQPFPQSK	Yes	Alpha gliadin/Low molecular weight glutenin	1	1	21	P06659.1	0	3927.92	High	6.18
FALSE	High	QQGYYPTSPQQLGQGQQPR	Yes	Alpha gliadin	1	8	16	P10387.1	0	2161.04	High	4.63
FALSE	High	QQGYYPTSPQQPGQGQQLGQGQPGYYPTSQQPGQK	Yes	High molecular weight glutenin	1	25	17	AHC72166.1	0	3806.78	High	7.68
FALSE	High	QQQPPFLQQQQPSLPQQPPFSQQQQQL	Yes	Low molecular weight glutenin	2	12	11	AFU48612.1; ACA63856.1	0	3201.61	High	6.3
FALSE	High	RPQQPYPQSQPQYSQPQQPISQQQQQQQQQQKQ	Yes	Alpha gliadin	1	1	28	ABQ52117.1	0	4018.95	High	9.32
FALSE	High	RPQQPYPQSQPQYSQPQQPISQQQQQQQQQQKQQ	Yes	Alpha gliadin	1	1	15	ABQ52117.1	0	4147.01	High	10.23
FALSE	High	SLQQPGQGQQGHYPASLQQPGQGQPGQR	Yes	High molecular weight glutenin	1	18	13	P10387.1	0	2957.44	High	6.5
FALSE	High	SLQQPGQGQQIGQGQQGYYPTSPQHPGQR	Yes	High molecular weight glutenin	1	19	13	AGZ95069.1	0	3150.51	High	5.5
FALSE	High	SSSLQQPGQGLQGHYPASLQQPGQGHPGQR	Yes	High molecular weight glutenin	1	7	17	AGZ95069.1	0	3125.53	High	7.1
FALSE	High	VLPQQPPFSQQQQPVLPPQQSPFPQQQQHQQL	Yes	Low molecular weight glutenin	1	49	15	AAV92014.1	0	3730.91	High	6.87
FALSE	High	VPVPQLQPQNPSQQQPQK	Yes	Alpha gliadin	2	49	30	AWK59799.1; AKC91283.1	0	2041.08	High	5.14
FALSE	High	VQQQQFIGQQQPFPPQQPYPQPQPFPSQQPY	Yes	Alpha gliadin	12	235	20	AKB95610.1; APU92384.1; APU92628.1; APU92461.1; AGO17673.1; AFF27488.1; AWK59799.1; AFX69577.1; APU92643.1; AKC91120.1; AKC91124.1; APU92357.1	0	3680.79	High	5.85
FALSE	High	VQQQQFPGQQQPFPPQQPYPQLQPFPSQQPY	Yes	Alpha gliadin	1	65	17	AFX69632.1	0	3680.79	High	5.12
FALSE	High	VQQQQFPGQQQPFPPQQPYPQPQPFPSQQPY	Yes	Alpha gliadin	8	86	32	AWK59783.1; AKC91155.1; APU92571.1; ABQ52117.1; ABS72157.1; AGO17671.1; AFX69586.1; SCW25764.1	0	3664.76	High	5.61
FALSE	High	VQQQQFPGQQQPFPPQQPYPQPQPFPSQQPYPQPQPF	Yes	Alpha gliadin	1	1	12	AWK59783.1	0	4359.1	High	6.96
FALSE	High	VQQQQFPGQQQQFPPQQPYPQPQPFPSQQPY	Yes	Alpha gliadin	2	68	25	AGO17661.1; APU92676.1	0	3695.77	High	5.77
FALSE	High	VRFPVPQLQPQNPSQQQPQEQVPL	Yes	Alpha gliadin	2	22	14	ABQ45317.1; SCW25722.1	0	2782.46	High	4.97
FALSE	High	VRVPVPQLQLQNPSQQQPQEQVPL	Yes	Alpha gliadin	1	34	10	ABQ52126.1	0	2750.49	High	4.96
FALSE	High	VRVPVPQLQPQN	Yes	Alpha gliadin	34	586	22	AWK59783.1; AKB95610.1; AKC91155.1; AMS25609.1; APU92571.1; AKC91128.1; CAB76962.1; AKB95618.1; AKC91171.1; APU92628.1; APU92650.1; AGI15857.1; APU92461.1; ABQ52117.1; APU92253.1; AFF27488.1; AMS25598.1; SCW25744.1; AKC91168.1; ABS72157.1; AGO17671.1; AFX69586.1; APU92435.1; SCW25764.1; ATL17022.1; AKC91283.1; APU92643.1; APU92449.1; APU92676.1; ATL17024.1; AKC91120.1; AKC91124.1; AKC91127.1; APU…	0	1374.79	High	2.96
FALSE	High	VRVPVPQLQPQNPSQQQPQEQVPL	Yes	Alpha gliadin	23	447	59	AWK59783.1; AKC91155.1; APU92571.1; AKC91171.1; APU92628.1; AGI15857.1; APU92461.1; ABQ52117.1; APU92253.1; AMS25598.1; AKC91168.1; ABS72157.1; AGO17671.1; AFX69586.1; APU92435.1; SCW25764.1; ATL17022.1; APU92643.1; APU92449.1; APU92676.1; ATL17024.1; AKC91120.1; APU92357.1	0	2734.46	High	5.26
FALSE	High	VRVPVPQLQPQNPSQQQPQK	Yes	Alpha gliadin	1	47	33	AKC91283.1	0	2296.25	High	5.12
FALSE	High	VTVPVPQLQPQNPSQQQPQK	Yes	Alpha gliadin	1	2	18	AWK59799.1	0	2241.2	High	4.69
FALSE	High	VYYPTSPQQSGQGQQGYYPTSPQQSGQGQQPGQGQQPR	Yes	High molecular weight glutenin	1	4	10	AHC72166.1	0	4122.89	High	7.43
FALSE	High	YPTSPQQSGQGQQGYYPTSPQQSGQGQQPGQGQQPR	Yes	High molecular weight glutenin	1	19	11	AHC72166.1	0	3860.76	High	9.06
FALSE	High	YSSSLQQPGQGLQGHYPASLQQPGQGHPGQR	Yes	High molecular weight glutenin	1	7	11	AGZ95069.1	0	3288.59	High	6.14
FALSE	High	YYPTSLQQPGQGQQIGK	Yes	High molecular weight glutenin	2	27	36	P10387.1; P08488.1	0	1892.95	High	4.29
FALSE	High	YYPTSSQQPGQLQQLAQGQQGQQPER	Yes	High molecular weight glutenin	1	21	11	ABG68031.1	0	2945.41	High	5.56

## Sheet: 20 min gastric No Actnidin
Peptide profiles of the gastric samples digested without actinidin at 20 min
Checked	Confidence	Sequence	Immunogenic or not	Protein	# Protein Groups	# Proteins	# PSMs	Master Protein Accessions	# Missed Cleavages	Theo. MH+ [Da]	Confidence (by Search Engine): Sequest HT	XCorr (by Search Engine): Sequest HT
FALSE	High	LQLQPFPQPQLPY	P1 - yes	Alpha gliadin	19	417	31	AFX69623.1; APU92337.1; CAB76962.1; AKB95618.1; AFX69628.1; APU92384.1; AKC91171.1; AGO17677.1; AGI15857.1; AGI15856.1; AFH74440.1; ABQ52117.1; AGO17673.1; AAY45922.1; APU92435.1; APU92643.1; APU92449.1; ABQ52118.1; AKC91124.1	0	1568.85	High	3.42
FALSE	High	LQLQPFPQPQLPYPQPQPF	P2 - yes	Alpha gliadin	1	46	2	APU92435.1	0	2263.19	High	4.61
FALSE	High	LQLQPFPQPQLPYPQPHLPYPQPQPF	P3 - yes	Alpha gliadin	2	18	5	APU92643.1; ABQ52118.1	0	3095.61	High	5.06
FALSE	High	LQLQPFPQPQLPYPQPQLPYPQPQLPYPQPQPF	P5 - yes	Alpha gliadin	3	27	4	AFX69628.1; ABQ52117.1; APU92449.1	0	3910.04	High	5.98
FALSE	High	RPQQPYPQPQPQY	P6 - yes	Alpha gliadin	19	413	4	AFX69623.1; APU92337.1; AKB95610.1; CAB76962.1; AKB95618.1; APU92384.1; AKC91171.1; APU92628.1; AGO17677.1; APU92650.1; AGI15857.1; AFH74440.1; AGO17673.1; AAY45922.1; ABQ45317.1; APU92435.1; APU92643.1; ABQ52118.1; APU92583.1	0	1626.8	High	3.02
FALSE	High	VRVPVPQLQPQNPSQQQPQEQVPLVQQQQF	P9 - yes	Alpha gliadin	11	372	12	AFX69628.1; AKC91171.1; APU92628.1; AGO17677.1; AGI15857.1; APU92369.1; AFH74440.1; ABQ52117.1; APU92643.1; ATL17024.1; AKC91215.1	0	3492.83	High	5.75
FALSE	High	AGEGAVGVPLFHAQWGAR	No		1	1	14	ABG68039.1	0	1822.93	High	5.16
FALSE	High	AGEGAVGVPLFQAQWGAR	No		1	1	11	ABG68030.1	0	1813.93	High	4.77
FALSE	High	APFASIVAGIGGQ	No		1	1	69	P08453.1	0	1187.64	High	4.09
FALSE	High	ARVPMPQLQPQN	No		1	2	22	AHY37813.1	0	1394.72	High	2.7
FALSE	High	FASIVAGIGGQ	No		1	1	24	P08453.1	0	1019.55	High	2.98
FALSE	High	GRVPVPQLQPQN	No		1	5	11	AGO17673.1	0	1332.74	High	2.88
FALSE	High	GTSSQTVQGYYPGVTSPR	No		1	10	20	P10387.1	0	1884.91	High	5.08
FALSE	High	GYYPTSPWQPEQLQQPTQGQQR	No		2	23	15	ABG68031.1; ADY38701.1	0	2617.24	High	5.45
FALSE	High	IFWGIPALLKR	No		3	34	95	P08489.1; AIU47923.1; ABX89297.1	0	1313.81	High	3.61
FALSE	High	LPWSTGLQMR	No		6	90	12	AHI62988.1; AWM72943.1; SCW25215.1; P10387.1; AGZ95069.1; AOZ35399.1	0	1188.62	High	2.59
FALSE	High	QPGYYPTSPWQPEQLQQPTQGQQR	No		2	23	12	ABG68031.1; ADY38701.1	0	2842.35	High	4.08
FALSE	High	QVVDQQLAGRLPWSTGLQMR	No		5	50	12	AHI62988.1; SCW25215.1; P10387.1; AGZ95069.1; AOZ35399.1	0	2299.2	High	5.22
FALSE	High	RYYLSVTSPQQV	No		2	26	11	ABG68031.1; ADY38701.1	0	1440.75	High	3.43
FALSE	High	SHIPGLERPSQQQPLPPQQTL	No		2	35	13	ACA63856.1; ACA63852.1	0	2351.25	High	4.11
FALSE	High	SHIPGLERPSQQQPLPPQQTLSHH	No		1	21	10	ACA63856.1	0	2712.4	High	4.3
FALSE	High	SHIPGLERPSQQQPLPPQQTLSHHQ	No		1	12	13	ACA63856.1	0	2840.46	High	4.14
FALSE	High	SHIPGLERPSQQQPLPPQQTLSHHQQQQPIQQQPQPF	No		1	4	32	ACA63856.1	0	4288.18	High	6.58
FALSE	High	SQQPQQIFPQPQQTFPHQPQQQFPQPQQPQQQF	No		1	1	21	P06659.1	0	3998.93	High	5.09
FALSE	High	SSLVSIILPR	No		1	1	22	P21292.1	0	1084.67	High	3
FALSE	High	TTTSVPFGVGTGVGSY	No		1	7	12	ACA63856.1	0	1529.75	High	3.15
FALSE	High	VRFPVPQLQPQN	No		1	27	63	ABQ45317.1	0	1422.79	High	3.16
FALSE	High	VRVSVPQLQPQN	No		1	6	11	AKC91132.1	0	1364.76	High	2.52
FALSE	High	WGTSSQTVQGYYPGVTSPR	No		1	10	18	P10387.1	0	2070.99	High	5.73
FALSE	High	YLTSPQQLGQGQQPR	No		3	37	33	ABG68031.1; ADY38704.1; ADY38701.1	0	1700.87	High	3.97
FALSE	High	YYPTSPQLSGQGQRPGQW	No		2	20	12	P08489.1; ABX89297.1	0	2049.98	High	4.15
FALSE	High	AIVYSIILQQQQQQQQQQQQR	Yes	Alpha gliadin	1	4	30	ABX84154.1	0	2584.36	High	6.83
FALSE	High	IGQQQPFPPQQPYPQPQPFPSQQPY	Yes	Alpha gliadin /LMW glutenin	14	255	72	APU92337.1; AKB95610.1; APU92384.1; APU92628.1; AGO17677.1; AGI15856.1; AFH74440.1; AGO17673.1; AFF27488.1; AFN08646.1; AAY45922.1; AWK59799.1; APU92643.1; AKC91124.1	0	2922.42	High	5.04
FALSE	High	LQLQPFPQPQLSY	Yes	Alpha gliadin	1	13	21	AHY37813.1	0	1558.83	High	3.78
FALSE	High	LQLQPFPQPQPFPPQLPYPQPQ	Yes	Alpha gliadin	1	47	16	AKC91215.1	0	2585.36	High	4.55
FALSE	High	LTSPQQSGQWQQPGQGQSGYYPTSPQQSGQK	Yes	High molecular weight glutenin	1	4	10	ABG68031.1	0	3363.56	High	5.73
FALSE	High	PQAQASVQPQQLPQFEEIRNLAR	Yes	Alpha gliadin	1	7	14	AKC91124.1	0	2648.39	High	5.27
FALSE	High	QLVYYPTSPQQSGQGQQGYYPTSPQQSGQGQQPGQGQQPR	Yes	High molecular weight glutenin	1	3	10	AHC72166.1	0	4364.04	High	5.13
FALSE	High	QPFPQQPQQPYPQQPQQPFPQTQQPQQPFPQSK	Yes	Alpha gliadin/Low molecular weight glutenin	1	1	17	P06659.1	0	3927.92	High	5.76
FALSE	High	QQGYYPTSPQQPGQGQQLGQGQPGYYPTSQQPGQK	Yes	High molecular weight glutenin	1	25	14	AHC72166.1	0	3806.78	High	5.5
FALSE	High	SLQQPGQGLQGHYPASLQQPGQGHPGQR	Yes	High molecular weight glutenin	1	8	11	AGZ95069.1	0	2951.46	High	6.35
FALSE	High	SLQQPGQGQQGHYPASLQQPGQGQPGQR	Yes	High molecular weight glutenin	2	18	12	SCW25215.1; P10387.1	0	2957.44	High	5.32
FALSE	High	SLQQPGQGQQGYYPTSLQHTGQR	Yes	High molecular weight glutenin	1	8	15	P10387.1	0	2559.23	High	6.29
FALSE	High	SLQQPGQGQQIGQGQQGYYPTSPQHPGQR	Yes	High molecular weight glutenin	2	19	10	SCW25215.1; AGZ95069.1	0	3150.51	High	5.74
FALSE	High	SSSLQQPGQGLQGHYPASLQQPGQGHPGQR	Yes	High molecular weight glutenin	1	7	23	AGZ95069.1	0	3125.53	High	6.59
FALSE	High	TASLQQPGQGQQGHYPASLQQVGQGQQIGQLGQR	Yes	High molecular weight glutenin	1	11	37	AGZ95069.1	0	3573.79	High	8.59
FALSE	High	VPVPQLQPQNPSQQQPQK	Yes	Alpha gliadin	2	49	14	AFX69637.1; AWK59799.1	0	2041.08	High	5.1
FALSE	High	VPVPQLQPQNPSQQQPREQVPLVQ	Yes	Alpha gliadin	1	1	19	AKB95610.1	0	2734.46	High	3.31
FALSE	High	VQQQQFIGQQQPFPPQQPYPQPQPFPSQQPY	Yes	Alpha gliadin	13	235	60	APU92337.1; AKB95610.1; APU92384.1; APU92628.1; AGO17677.1; AGI15856.1; AFH74440.1; AGO17673.1; AFF27488.1; AFN08646.1; AWK59799.1; APU92643.1; AKC91124.1	0	3680.79	High	6.22
FALSE	High	VQQQQFPGQQQPFPPQQPYPQPQPFPSQQPY	Yes	Alpha gliadin	2	86	39	AFX69628.1; ABQ52117.1	0	3664.76	High	5.68
FALSE	High	VQQQQFPGQQQQFPPQQPYPQPQPFPSQQPY	Yes	Alpha gliadin	4	68	11	APU92369.1; AKC91215.1; ABQ52118.1; APU92583.1	0	3695.77	High	5.49
FALSE	High	VRVPVPQLQLQN	Yes	Alpha gliadin	1	36	55	APU92530.1	0	1390.82	High	3.8
FALSE	High	VRVPVPQLQPQ	Yes	Alpha gliadin	28	602	35	APU92337.1; AKB95610.1; AMS25600.1; CAB76962.1; AKB95618.1; AFX69628.1; AKC91171.1; APU92628.1; AGO17677.1; APU92650.1; AGI15857.1; AGI15856.1; ADA83695.1; APU92369.1; AFH74440.1; ABQ52117.1; ACI03052.1; AFF27488.1; AFN08646.1; AAY45922.1; SCW25744.1; AFX69637.1; APU92435.1; APU92643.1; APU92449.1; ATL17024.1; AKC91215.1; AKC91124.1	0	1260.74	High	3
FALSE	High	VRVPVPQLQPQN	Yes	Alpha gliadin	27	586	195	APU92337.1; AKB95610.1; AMS25600.1; CAB76962.1; AKB95618.1; AFX69628.1; AKC91171.1; APU92628.1; AGO17677.1; APU92650.1; AGI15857.1; AGI15856.1; ADA83695.1; APU92369.1; AFH74440.1; ABQ52117.1; ACI03052.1; AFF27488.1; AFN08646.1; SCW25744.1; AFX69637.1; APU92435.1; APU92643.1; APU92449.1; ATL17024.1; AKC91215.1; AKC91124.1	0	1374.79	High	3.05
FALSE	High	VRVPVPQLQPQNPS	Yes	Alpha gliadin	26	579	10	APU92337.1; AKB95610.1; AMS25600.1; CAB76962.1; AKB95618.1; AFX69628.1; AKC91171.1; APU92628.1; AGO17677.1; AGI15857.1; AGI15856.1; ADA83695.1; APU92369.1; AFH74440.1; ABQ52117.1; ACI03052.1; AFF27488.1; AFN08646.1; SCW25744.1; AFX69637.1; APU92435.1; APU92643.1; APU92449.1; ATL17024.1; AKC91215.1; AKC91124.1	0	1558.87	High	3.39
FALSE	High	VRVPVPQLQPQNPSQ	Yes	Alpha gliadin	26	573	27	APU92337.1; AKB95610.1; AMS25600.1; CAB76962.1; AKB95618.1; AFX69628.1; AKC91171.1; APU92628.1; AGO17677.1; AGI15857.1; AGI15856.1; ADA83695.1; APU92369.1; AFH74440.1; ABQ52117.1; ACI03052.1; AFF27488.1; AFN08646.1; SCW25744.1; AFX69637.1; APU92435.1; APU92643.1; APU92449.1; ATL17024.1; AKC91215.1; AKC91124.1	0	1686.93	High	4.74
FALSE	High	VRVPVPQLQPQNPSQQ	Yes	Alpha gliadin	25	572	23	APU92337.1; AKB95610.1; AMS25600.1; CAB76962.1; AKB95618.1; AFX69628.1; AKC91171.1; APU92628.1; AGO17677.1; AGI15857.1; AGI15856.1; ADA83695.1; APU92369.1; AFH74440.1; ABQ52117.1; ACI03052.1; AFF27488.1; AFN08646.1; SCW25744.1; AFX69637.1; APU92435.1; APU92643.1; APU92449.1; ATL17024.1; AKC91215.1	0	1814.99	High	4.47
FALSE	High	VRVPVPQLQPQNPSQQQ	Yes	Alpha gliadin	22	565	13	APU92337.1; AKB95610.1; AMS25600.1; AKB95618.1; AFX69628.1; AKC91171.1; APU92628.1; AGO17677.1; AGI15857.1; AGI15856.1; APU92369.1; AFH74440.1; ABQ52117.1; ACI03052.1; AFN08646.1; SCW25744.1; AFX69637.1; APU92435.1; APU92643.1; APU92449.1; ATL17024.1; AKC91215.1	0	1943.05	High	4.7
FALSE	High	VRVPVPQLQPQNPSQQQPQ	Yes	Alpha gliadin	21	557	16	APU92337.1; AMS25600.1; AKB95618.1; AFX69628.1; AKC91171.1; APU92628.1; AGO17677.1; AGI15857.1; AGI15856.1; APU92369.1; AFH74440.1; ABQ52117.1; ACI03052.1; AFN08646.1; SCW25744.1; AFX69637.1; APU92435.1; APU92643.1; APU92449.1; ATL17024.1; AKC91215.1	0	2168.16	High	5.41
FALSE	High	VRVPVPQLQPQNPSQQQPQEQVPL	Yes	Alpha gliadin	15	447	57	AMS25600.1; AFX69628.1; AKC91171.1; APU92628.1; AGO17677.1; AGI15857.1; APU92369.1; AFH74440.1; ABQ52117.1; ACI03052.1; APU92435.1; APU92643.1; APU92449.1; ATL17024.1; AKC91215.1	0	2734.46	High	5.29
FALSE	High	VRVPVPQLQPQNPSQQQPQK	Yes	Alpha gliadin	1	47	44	AFX69637.1	0	2296.25	High	5.07
FALSE	High	VTVPVPQLQPQNPSQQQPQK	Yes	Alpha gliadin	1	2	19	AWK59799.1	0	2241.2	High	3.83
FALSE	High	YLTSPQQSGQWQQPGQGQSGYYPTSPQQSGQK	Yes	High molecular weight glutenin	1	4	14	ABG68031.1	0	3526.63	High	7.11
FALSE	High	YSSSLQQPGQGLQGHYPASLQQPGQGHPGQR	Yes	High molecular weight glutenin	1	7	12	AGZ95069.1	0	3288.59	High	5.74
FALSE	High	YYPTSLQQPGQGQQIGK	Yes	High molecular weight glutenin	2	27	61	ABN71646.1; P10387.1	0	1892.95	High	4.04
FALSE	High	YYPTSSQQPGQLQQLAQGQQGQQPER	Yes	High molecular weight glutenin	2	21	18	ABG68031.1; ADY38701.1	0	2945.41	High	5.5

## Sheet: 60 min gastric No Actinidin
Peptide profiles of the gastric samples digested without actinidin at 60 min
Checked	Confidence	Sequence	Immunogenic or not	Protein	# Protein Groups	# Proteins	# PSMs	Master Protein Accessions	# Missed Cleavages	Theo. MH+ [Da]	Confidence (by Search Engine): Sequest HT	XCorr (by Search Engine): Sequest HT
FALSE	High	LQLQPFPQPQLPY	P1 - yes	Alpha gliadin	26	417	22	AKC91288.1; APU92397.1; AKC91202.1; CAB76962.1; AKB95618.1; AFX69628.1; APU92384.1; AKC91171.1; AGO17677.1; AGI15857.1; AAY45933.1; AFH74440.1; APU92461.1; ABQ52117.1; AKC91275.1; AGO17673.1; AFX69625.1; APU92318.1; APU92435.1; AKC91283.1; APU92643.1; AHN85628.1; AKC91120.1; AKC91245.1; AKC91124.1; SCW25722.1	0	1568.85	High	3.91
FALSE	High	LQLQPFPQPQLPYPQPQPF	P2 - yes	Alpha gliadin	2	46	15	AAY45933.1; APU92435.1	0	2263.19	High	4.44
FALSE	High	LQLQPFPQPQLPYPQPHLPYPQPQPF	P3 - yes	Alpha gliadin	2	18	56	AKC91275.1; APU92643.1	0	3095.61	High	5.96
FALSE	High	LQLQPFPQPQLPYPQPQLPYPQPQPF	P4 - yes	Alpha gliadin	1	25	2	AFX69625.1	0	3086.61	High	5.51
FALSE	High	LQLQPFPQPQLPYPQPQLPYPQPQLPYPQPQPF	P5 - yes	Alpha gliadin	3	27	30	AFX69628.1; ABQ52117.1; AKC91120.1	0	3910.04	High	5.41
FALSE	High	RPQQPYPQPQPQY	P6 - yes	Alpha gliadin	27	413	7	AKB95610.1; APU92397.1; AKC91202.1; APU92571.1; CAB76962.1; AKB95618.1; APU92384.1; AKC91171.1; APU92628.1; AGO17677.1; APU92650.1; AGI15857.1; AAY45933.1; AFH74440.1; APU92461.1; AKC91275.1; AGO17673.1; AAY45937.1; AFX69625.1; APU92318.1; APU92435.1; AKC91283.1; APU92643.1; AHN85628.1; AKC91245.1; SCW25722.1; AKC91175.1	0	1626.8	High	3.75
FALSE	High	VRVPVPQLQPQNPSQQQPQEQVPLVQQQQF	P9 -yes	Alpha gliadin	27	372	15	AWK59783.1; AKC91288.1; APU92397.1; AKC91202.1; AFX69624.1; APU92571.1; AFX69628.1; AKC91171.1; APU92628.1; AGO17677.1; AGI15857.1; AAY45933.1; AFH74440.1; APU92461.1; ABQ52117.1; AAY45937.1; QDD55735.1; AFX69625.1; ATL17022.1; APU92643.1; AHN85628.1; APU92676.1; P04725.1; ATL17024.1; AKC91120.1; APU92486.1; AKC91175.1	0	3492.83	High	5.5
FALSE	High	APFASIVAGIGGQ	No		1	1	57	P08453.1	0	1187.64	High	4.35
FALSE	High	FASIVAGIGGQ	No		1	1	32	P08453.1	0	1019.55	High	3.77
FALSE	High	GGSFYPGETTPPQQLQQR	No		2	39	12	AEO45112.2; ABX89297.1	0	1990.96	High	4.37
FALSE	High	GTSSQTVQGYYPGVTSPR	No		1	10	24	P10387.1	0	1884.91	High	4.81
FALSE	High	IFWGIPALLKR	No		2	34	37	AEO45112.2; ABX89297.1	0	1313.81	High	3.64
FALSE	High	LQPHQIAQLEVMNSIALR	No		1	8	18	ACY08811.1	0	2061.13	High	7.41
FALSE	High	LTSPQQLGQGQQPR	No		1	37	12	ABG68031.1	0	1537.81	High	3.84
FALSE	High	QPGYYPTSPWQPEQLQQPTQGQQR	No		1	23	12	ABG68031.1	0	2842.35	High	5.49
FALSE	High	QYEQQVVVPPK	No		1	44	13	ABG68031.1	0	1314.71	High	3.14
FALSE	High	SHHQQQQPIQQQPQPF	No		1	10	15	ACA63856.1	0	1955.95	High	4.66
FALSE	High	SHIPGLEKPSQQQPLPLQQTL	No		1	22	25	ACY08822.1	0	2339.27	High	4.59
FALSE	High	SHIPGLERPSQQQPLPPQQT	No		3	38	17	AFU48612.1; CAA76890.1; ACA63856.1	0	2238.16	High	3.57
FALSE	High	SHIPGLERPSQQQPLPPQQTL	No		3	35	83	AFU48612.1; CAA76890.1; ACA63856.1	0	2351.25	High	4.78
FALSE	High	SHIPGLERPSQQQPLPPQQTLSHHQQQQPIQQQPQPF	No		1	4	15	ACA63856.1	0	4288.18	High	7.63
FALSE	High	SLQQVGQGQQIGQLGQR	No		1	11	10	AGZ95069.1	0	1824.97	High	5.51
FALSE	High	SQQPQQIFPQPQQTFPHQPQQQFPQPQQPQQQ	No		1	1	10	P06659.1	0	3851.86	High	5.95
FALSE	High	SSLVSIILPR	No		1	1	22	P21292.1	0	1084.67	High	2.58
FALSE	High	THGAFLQPHQIAQLEVMNSIALR	No		1	8	10	ACY08811.1	0	2574.36	High	8.82
FALSE	High	WGIPALLR	No		3	90	37	ABG68031.1; AHC72166.1; AAR83982.1	0	925.562	High	2.57
FALSE	High	WGTSSQTVQGYYPGVTSPR	No		1	10	19	P10387.1	0	2070.99	High	5.63
FALSE	High	YLTSPQQLGQGQQPR	No		1	37	44	ABG68031.1	0	1700.87	High	4.12
FALSE	High	YYPTSPQLSGQGQR	No		2	21	12	AEO45112.2; ABX89297.1	0	1581.77	High	3.57
FALSE	High	YYPTSPQLSGQGQRPGQ	No		2	21	12	AEO45112.2; ABX89297.1	0	1863.9	High	4.01
FALSE	High	YYPTSPQLSGQGQRPGQW	No		2	20	69	AEO45112.2; ABX89297.1	0	2049.98	High	4.68
FALSE	High	AIVYSIILQQQQQQQQQQQQR	Yes	Alpha gliadin	1	4	11	ACY08811.1	0	2584.36	High	5.58
FALSE	High	FIGQQQPFPPQQPYPQPQPFPSQQPY	Yes	Alpha gliadin	17	252	20	AKB95610.1; AKC91288.1; AKC91202.1; APU92384.1; APU92628.1; AGO17677.1; AFH74440.1; APU92461.1; AKC91275.1; AGO17673.1; AFF27488.1; AWK59799.1; APU92643.1; AKC91120.1; AKC91245.1; AKC91124.1; AKC91175.1	0	3069.49	High	4.9
FALSE	High	FPQPQQTFPHQPQQQVPQPQQPQQPF	Yes	Alpha gliadin	1	1	13	P08453.1	0	3110.52	High	7.2
FALSE	High	FQPSQQNPQAQGSFQPQQLPQFEAIR	Yes	Alpha gliadin	1	26	14	APU92435.1	0	2999.48	High	6.24
FALSE	High	GKELHTPQEQFPQQQQFPQPQQFPQQQIL	Yes	Low molecular weight glutenin	1	2	13	CAR82267.1	0	3502.75	High	6.53
FALSE	High	GRVPVPQLQPQNPSQQQPQEQVPL	Yes	Alpha gliadin	1	5	14	AGO17673.1	0	2692.42	High	4.69
FALSE	High	HYPASLQQPGQGQQGHY	Yes	High molecular weight glutenin	2	27	15	P10387.1; AGZ95069.1	0	1895.88	High	5.59
FALSE	High	IGQQQPFPPQQPYPQPQPF	Yes	Alpha gliadin	19	283	14	AKB95610.1; AKC91288.1; AKC91202.1; APU92384.1; APU92628.1; AGO17677.1; AFH74440.1; APU92461.1; AKC91275.1; AGO17673.1; AFF27488.1; AWK59799.1; AHY37813.1; APU92643.1; AKC91120.1; AKC91245.1; AKC91124.1; SCW25722.1; AKC91175.1	0	2222.1	High	4.86
FALSE	High	IGQQQPFPPQQPYPQPQPFPS	Yes	Alpha gliadin	11	282	12	AFQ13474.1; AKB95610.1; SCW25742.1; AKC91202.1; APU92675.1; AHY37813.1; AKC91120.1; AKC91124.1; APU92653.1; APU92521.1; AFF27487.1	0	2406.19	High	5.27
FALSE	High	IGQQQPFPPQQPYPQPQPFPS	Yes	Alpha gliadin	19	282	46	AKB95610.1; AKC91288.1; AKC91202.1; APU92384.1; APU92628.1; AGO17677.1; AFH74440.1; APU92461.1; AKC91275.1; AGO17673.1; AFF27488.1; AWK59799.1; AHY37813.1; APU92643.1; AKC91120.1; AKC91245.1; AKC91124.1; SCW25722.1; AKC91175.1	0	2406.19	High	4.65
FALSE	High	IGQQQPFPPQQPYPQPQPFPSQQPY	Yes	Alpha gliadin /LMW glutenin	17	255	122	AKB95610.1; AKC91288.1; AKC91202.1; APU92384.1; APU92628.1; AGO17677.1; AFH74440.1; APU92461.1; AKC91275.1; AGO17673.1; AFF27488.1; AWK59799.1; APU92643.1; AKC91120.1; AKC91245.1; AKC91124.1; AKC91175.1	0	2922.42	High	5.84
FALSE	High	LGQQQPFPPQQPYPQLQPFPSQQPY	Yes	Alpha gliadin /LMW glutenin	1	7	13	AGI15857.1	0	2938.45	High	4.7
FALSE	High	LGQQQPFPPQQPYPQPQPFPSQLPY	Yes	Alpha gliadin /LMW glutenin	1	21	14	SCW25722.1	0	2907.45	High	6.25
FALSE	High	LGQQQQQFPGQQQPFPPQQPYPQPQPF	Yes	Alpha gliadin	2	8	24	ATL17022.1; ATL17024.1	0	3163.54	High	5.49
FALSE	High	LQLQPFPQPQLPYPQPH	Yes	Alpha gliadin	2	19	11	AKC91275.1; APU92643.1	0	2028.07	High	3.83
FALSE	High	LQLQPFPQPQLSY	Yes	Alpha gliadin	1	13	14	AHY37813.1	0	1558.83	High	4.05
FALSE	High	LQLQPFPQPQPFPPQLPYPQPQ	Yes	Alpha gliadin	3	47	30	APU92676.1; P04725.1; APU92486.1	0	2585.36	High	4.4
FALSE	High	LQQQLVPQLQQPL	Yes	Low molecular weight glutenin	1	1	13	P08453.1	0	1532.88	High	3.66
FALSE	High	LQQQQIPQQQIPQQH	Yes	Alpha gliadin	1	2	10	CAR82267.1	0	1841.96	High	4.06
FALSE	High	LTSPQQSGQGQQPGQLQQSAQGQK	Yes	High molecular weight glutenin	2	22	15	AEO45112.2; ABX89297.1	0	2509.24	High	5.99
FALSE	High	QFPQQQLPQQQQIPQQQQIPQQPQQIPQQQQIPQQPK	Yes	Alpha gliadin/Low molecular weight glutenin	1	2	12	CAR82267.1	0	4453.31	High	5.01
FALSE	High	QGSYYPGQASPQQPGQGQQPGK	Yes	High molecular weight glutenin	2	29	13	P10387.1; AEO45113.1	0	2288.07	High	5.06
FALSE	High	QLVYYPTSPQQSGQGQQGYYPTSPQQSGQGQQPGQGQQPR	Yes	High molecular weight glutenin	1	3	12	AHC72166.1	0	4364.04	High	7.19
FALSE	High	QPFPQQPQQPYPQQPQQPFPQTQQPQQPFPQSK	Yes	Alpha gliadin/Low molecular weight glutenin	1	1	17	P06659.1	0	3927.92	High	7.02
FALSE	High	QQGYYPTSPQQLGQGQQPR	Yes	Alpha gliadin	1	8	14	P10387.1	0	2161.04	High	5.26
FALSE	High	QQGYYPTSPQQPGQGQQLGQGQPGYYPTSQQPGQK	Yes	High molecular weight glutenin	1	25	22	AHC72166.1	0	3806.78	High	7.34
FALSE	High	QQQPPFLQQQQPSLPQQPPFSQQQQQL	Yes	Low molecular weight glutenin	2	12	11	AFU48612.1; ACA63856.1	0	3201.61	High	6.67
FALSE	High	RPQQPYPQPQPQYSQPQQPI	Yes	Alpha gliadin	21	355	10	AKB95610.1; APU92397.1; AKC91202.1; APU92571.1; CAB76962.1; AKB95618.1; APU92384.1; AKC91171.1; APU92628.1; APU92650.1; AAY45933.1; APU92461.1; AKC91275.1; AGO17673.1; AFX69625.1; APU92318.1; APU92435.1; APU92643.1; AHN85628.1; SCW25722.1; AKC91175.1	0	2405.2	High	5.61
FALSE	High	RPQQPYPQSQPQYSQPQQPISQQQQQQQQQQKQ	Yes	Alpha gliadin	1	1	28	ABQ52117.1	0	4018.95	High	9.53
FALSE	High	RPQQPYPQSQPQYSQPQQPISQQQQQQQQQQKQQ	Yes	Alpha gliadin	1	1	17	ABQ52117.1	0	4147.01	High	9.1
FALSE	High	SFPQPQPQQPQQPSILQPQQPF	Yes	Alpha gliadin	1	1	10	CAR82265.1	0	2545.28	High	3.87
FALSE	High	SLQQPGQGQQGHYPASLQQPGQGQPGQR	Yes	High molecular weight glutenin	2	18	11	P10387.1; AEO45113.1	0	2957.44	High	4.76
FALSE	High	SLQQPGQGQQGHYPTSLQQLGQGQQTGQPGQK	Yes	High molecular weight glutenin	1	8	12	P10387.1	0	3389.66	High	6.82
FALSE	High	SLQQPGQGQQIGQGQQGYYPTSPQHPGQR	Yes	High molecular weight glutenin	1	19	18	AGZ95069.1	0	3150.51	High	5.9
FALSE	High	SSSLQQPGQGLQGHYPASLQQPGQGHPGQR	Yes	High molecular weight glutenin	1	7	15	AGZ95069.1	0	3125.53	High	5.69
FALSE	High	SYYPGQASPQRPGQGQQPGQGQQGYYPTSPQQPGQW	Yes	High molecular weight glutenin	1	6	13	ABX89297.1	0	3933.8	High	5.57
FALSE	High	SYYPGQASPQRPGQGQQPGQGQQGYYPTSPQQPGQWQQPEQGQPR	Yes	High molecular weight glutenin	1	4	11	ABG68042.1	0	4982.3	High	7.58
FALSE	High	TASLQQPGQGQQGHYPASLQQVGQGQQIGQLGQR	Yes	High molecular weight glutenin	1	11	14	AGZ95069.1	0	3573.79	High	7.67
FALSE	High	VLPQQPPFSQQQQPVLPPQQSPFPQQQQHQQL	Yes	Low molecular weight glutenin	1	49	13	AAP87371.1	0	3730.91	High	6.45
FALSE	High	VPVPQLQPQNPSQQQPQK	Yes	Alpha gliadin	2	49	24	AWK59799.1; AKC91283.1	0	2041.08	High	5.03
FALSE	High	VPVPQLQPQNPSQQQPREQVPLVQ	Yes	Alpha gliadin	1	1	12	AKB95610.1	0	2734.46	High	4.73
FALSE	High	VQQQQFIGQQQPFPPQQPYPQPQPFPSQQPY	Yes	Alpha gliadin	16	235	38	AKB95610.1; AKC91288.1; AKC91202.1; APU92384.1; APU92628.1; AGO17677.1; AFH74440.1; APU92461.1; AKC91275.1; AGO17673.1; AFF27488.1; AWK59799.1; APU92643.1; AKC91120.1; AKC91124.1; AKC91175.1	0	3680.79	High	5.9
FALSE	High	VQQQQFPGQQQPFPPQQPYPQPQPFPSQQPY	Yes	Alpha gliadin	7	86	31	AWK59783.1; APU92571.1; AFX69628.1; ABQ52117.1; AAY45937.1; AFX69625.1; AHN85628.1	0	3664.76	High	5.37
FALSE	High	VQQQQFPGQQQQFPPQQPYPQPQPFPSQQPY	Yes	Alpha gliadin	5	68	30	AGO17661.1; AFQ13472.1; APU92676.1; P04725.1; APU92486.1	0	3695.77	High	5.82
FALSE	High	VRFPVPQLQPQNPSQQQPQEQVPL	Yes	Alpha gliadin	2	22	32	AKC91270.1; SCW25722.1	0	2782.46	High	4.86
FALSE	High	VRVPVPQLQLQN	Yes	Alpha gliadin	1	36	20	APU92318.1	0	1390.82	High	3.93
FALSE	High	VRVPVPQLQLQNPSQQQPQEQVPL	Yes	Alpha gliadin	1	34	16	APU92318.1	0	2750.49	High	4.97
FALSE	High	VRVPVPQLQPQN	Yes	Alpha gliadin	39	586	51	AWK59783.1; AKB95610.1; AKC91288.1; APU92397.1; AKC91202.1; AFX69624.1; AMS25609.1; APU92571.1; CAB76962.1; AKB95618.1; AFX69628.1; AKC91171.1; APU92628.1; AGO17677.1; APU92650.1; AGI15857.1; AAY45933.1; AFH74440.1; APU92461.1; ABQ52117.1; AKC91275.1; AFF27488.1; AAY45937.1; QDD55735.1; AFX69625.1; ADA83694.1; APU92435.1; ATL17022.1; AKC91283.1; APU92643.1; AHN85628.1; AKC91161.1; APU92676.1; P04…	0	1374.79	High	2.94
FALSE	High	VRVPVPQLQPQNPSQQQPQEQVPL	Yes	Alpha gliadin	29	447	85	AWK59783.1; AKC91288.1; APU92397.1; AKC91202.1; AFX69624.1; APU92571.1; AFX69628.1; AKC91171.1; APU92628.1; AGO17677.1; AGI15857.1; AAY45933.1; AFH74440.1; APU92461.1; ABQ52117.1; AAY45937.1; QDD55735.1; AFX69625.1; APU92435.1; ATL17022.1; APU92643.1; AHN85628.1; AKC91161.1; APU92676.1; P04725.1; ATL17024.1; AKC91120.1; APU92486.1; AKC91175.1	0	2734.46	High	5.07
FALSE	High	VRVPVPQLQPQNPSQQQPQK	Yes	Alpha gliadin	1	47	42	AKC91283.1	0	2296.25	High	6.33
FALSE	High	VTVPVPQLQPQNPSQQQPQK	Yes	Alpha gliadin	1	2	19	AWK59799.1	0	2241.2	High	3.92
FALSE	High	YLTSPQQSGQGQQPGQLQQSAQGQK	Yes	High molecular weight glutenin	2	22	16	AEO45112.2; ABX89297.1	0	2672.3	High	6.69
FALSE	High	YPTSPQQSGQGQQGYYPTSPQQSGQGQQPGQGQQPR	Yes	High molecular weight glutenin	1	19	11	AHC72166.1	0	3860.76	High	8.67
FALSE	High	YSSSLQQPGQGLQGHYPASLQQPGQGHPGQR	Yes	High molecular weight glutenin	1	7	21	AGZ95069.1	0	3288.59	High	5.95
FALSE	High	YYPTSLQQPGQGQQIGK	Yes	High molecular weight glutenin	2	27	28	P10387.1; AEO45113.1	0	1892.95	High	4.01
FALSE	High	YYPTSPQQSGQGQQGYYPTSPQQSGQGQQPGQGQQPR	Yes	High molecular weight glutenin	1	19	14	AHC72166.1	0	4023.82	High	6.03
FALSE	High	YYPTSSQQPGQLQQLAQGQQGQQPER	Yes	High molecular weight glutenin	1	21	15	ABG68031.1	0	2945.41	High	5.68

## Sheet: 20 min SI with Actinidin
Peptide profiles of the gastric and small intestinal digested samples with actinidin at 20 min
Checked	Confidence	Sequence	Immunogenic or not	Protein	# Proteins	# PSMs	Master Protein Accessions	# Missed Cleavages	Theo. MH+ [Da]	Confidence (by Search Engine): Sequest HT	XCorr (by Search Engine): Sequest HT
FALSE	High	GPQGIQGIQGVQGATGPQGPQGIQGIQGVQGITGATGAQGATGI	No		1	1	QEF19194.1	0	4011.06	High	8.14
FALSE	High	AQGTFLQPHQIAQLEVMTSIALRTLPT	No		72	2	ACA63864.1	0	2964.6	High	7.49
FALSE	High	QGVQGITGATGVQGATGIQGIQGEIGATGPEGPQGVQGAQGAIGPT	No		1	1	QEF19194.1	0	4171.1	High	6.99
FALSE	High	SIPLDPNTVQGAWTVVGTVIAGYGLARISASVFSELRS	No		2	1	KAA1099565.1	0	3932.09	High	6.89
FALSE	High	VSGGIGPIGGQGVQGITGPTGHQGVRGAQGAQGVVGAVGVQGAQGP	No		1	1	QEF17864.1	0	4075.12	High	6.82
FALSE	High	LQPHQIAQLEVMNSIALRNLPR	No		5	2	ACP27638.1	0	2541.41	High	6.81
FALSE	High	RYEAIRAIIYSIVLQEQQQVRGSIQTQQQQPQ	No		22	1	ACA63852.1	0	3800.02	High	6.8
FALSE	High	QQPPFLQQQPSFSQQPLFSQKQQPVLPQQPPFSQQQQ	No		1	1	AAP44992.1	0	4347.19	High	6.72
FALSE	High	PVNNGPKAKKRMRLDSAVFDTMKHLPCDQLRKKIVAHARY	No		4	1	KAA1124915.1	0	4648.5	High	5.16
FALSE	High	RPQQPYPQSQPQYSQPQQPISQQQQQQQQQQKQ	Yes	Alpha gliadin	1	1	ABQ52117.1	0	4018.95	High	8.97
FALSE	High	RPQQPYPQSQPQYSQPQQPISQQQQQQQQQQQKQ	Yes	Alpha gliadin	11	1	AFX69628.1	0	4147.01	High	8.26
FALSE	High	RPQQPYPQSQPQYSQPQQPISQQQQQQQQQQQK	Yes	Alpha gliadin	11	1	AFX69628.1	0	4018.95	High	7.85
FALSE	High	SPQRPGQGQQPGQGQQGYYPTSPQ	Yes	High molecular weight glutenin	6	1	ABG68042.1	0	2571.2	High	7.43
FALSE	High	SQQRPPFSQQQQQPVLPQQPPFS	Yes	Low molecular weight glutenin	16	1	ABE77188.1	0	2677.35	High	7.02
FALSE	High	IPEQSRYDAIRAIIYSIVLQEQQHGQG	Yes	Alpha gliadin	61	1	ALN96382.1; ABE77188.1	0	3112.62	High	6.31
FALSE	High	PSFLQQQQPVLPQQPPFSQQQQQFPQQQQPLLP	Yes	Low molecular weight glutenin	1	1	ALN96382.1	0	3882.99	High	6.17
FALSE	High	LQQPQQPFPQPQ	Yes	Alpha gliadin	1	2	P08453.1	0	1435.73	High	3.34
FALSE	High	LQLQPFPQPQ	Yes	Alpha gliadin	510	2	AFX69628.1; ABQ52117.1	0	1195.65	High	2.87

## Sheet: 60 min SI with Actinidin
Peptide profiles of the gastric and small intestinal digested samples with actinidin at 60 min
Checked	Confidence	Sequence	Immunogenic or not	Protein	# Proteins	# PSMs	Master Protein Accessions	# Missed Cleavages	Theo. MH+ [Da]	Confidence (by Search Engine): Sequest HT	XCorr (by Search Engine): Sequest HT
FALSE	High	PFPWQPQ	No		1	2	CAR82265.1	0	899.441	High	2.59
FALSE	High	AQGTFLQPHQIAQLEVMTSIALRTLPT	No		72	1	ACA63856.1	0	2964.6	High	8.16
FALSE	High	LQPHQIAQLEVMTSIALRTLPT	No		137	2	ACA63856.1	0	2460.36	High	7.37
FALSE	High	RYEAIRAIIYSIILQEQQQVQGSIQS	No		138	2	AGO31303.1	0	3034.63	High	7.32
FALSE	High	RYEAIRAIIYSIILQEQQQVQGSIQTPQ	No		14	1	ACA63856.1	0	3273.76	High	7.02
FALSE	High	RYEAIRAIIYSIILQEQQQVQGSIQ	No		167	1	AGO31303.1; ACA63856.1	0	2947.6	High	6.97
FALSE	High	LQPHQIAQLEVMTSIALRILPT	No		119	1	AGO31303.1	0	2472.4	High	6.49
FALSE	High	LQPHQIAQLEVMTSIALRTLPT	No		137	2	ACA63856.1	0	2476.36	High	6.32
FALSE	High	TGATGATGPRGNTGATGATGPQGNTGATGATGPQGV	No		1	1	QEF18212.1	0	3069.46	High	5.83
FALSE	High	LQPHQIAQLEVMTSIALR	No		301	2	AGO31303.1; ACA63856.1	0	2064.13	High	5.83
FALSE	High	HVSLVSSLVSIILPR	No		1	4	P21292.1	0	1619.98	High	5.58
FALSE	High	LQPHQIAQLEVMTSIALR	No		301	2	AGO31303.1; ACA63856.1	0	2048.13	High	5.45
FALSE	High	GPTGAEGPKGIQGIQGIQGVIGPTGAQGMVGIQGIAGPVGVTGAEGAQGAQGIR	No		1	1	QEF17864.1	0	4936.57	High	5.38
FALSE	High	AQGTFLQPHQIAQLEVMTSIALRILPT	No		114	1	AGO31303.1	0	2976.63	High	5.3
FALSE	High	RYEAIRAIIYSIILQEQQQVQGS	No		168	2	AGO31303.1; ACA63856.1	0	2706.46	High	5.24
FALSE	High	LPQLPYPQPQ	No		52	1	AKC91247.1	0	1180.64	High	3.11
FALSE	High	AIHNVVHAIILHQQQK	Yes	Alpha gliadin	301	2	AKC91247.1	0	1849.06	High	6.67
FALSE	High	AIHNVVHAIILHQQQKQQQQPS	Yes	Alpha gliadin	178	1	AKC91247.1	0	2545.37	High	6.45
FALSE	High	AIHNVVHAIILHQQHH	Yes	Alpha gliadin	38	1	AGO17684.1	0	1867.02	High	5.75
FALSE	High	PQLFPQPQPFPPQLPYPQPQ	Yes	Alpha gliadin	3	2	AWK59801.1	0	2344.21	High	5.57
FALSE	High	QFPGQQQPFPPQRPYPQPQP	Yes	Alpha gliadin	1	11	AFQ13464.1	0	2362.17	High	5.47
FALSE	High	QFPGQQQPFPPQRPYPQ	Yes	Alpha gliadin	1	2	AFQ13464.1	0	2040.01	High	5.36
FALSE	High	AIHNVVHAIILHQQQ	Yes	Alpha gliadin	479	2	AKC91247.1; AWK59801.1; AFQ13464.1	0	1720.96	High	5.04
FALSE	High	QFPGQQQPFPPQRPYPQPQ	Yes	Alpha gliadin	1	1	AFQ13464.1	0	2265.12	High	4.83
FALSE	High	PQQPQLPFPQQPQQPFPQPQ	Yes	Alpha gliadin	1	1	P21292.1	0	2355.19	High	4.63
FALSE	High	LQLQPFPQPQ	Yes	Alpha gliadin	510	1	AGO17684.1; AKC91247.1; AFQ13464.1	0	1195.65	High	2.91

## Sheet: 20 min SI No Actinidin
Peptide profiles of the gastric and small intestinal digested samples without actinidin at 20 min
Checked	Confidence	Sequence	Immunogenic or not	Protein	# Proteins	# PSMs	Master Protein Accessions	# Missed Cleavages	Theo. MH+ [Da]	Confidence (by Search Engine): Sequest HT	XCorr (by Search Engine): Sequest HT
FALSE	High	LQPHQIAQLEVMTSIALR	No		301	4	ACA63864.1; ALN96402.1; ACA63856.1; ACA63852.1; AAV92049.1	0	2048.13	High	7.64
FALSE	High	AQGTFLQPHQIAQLEVMTSIALRTLPTMCNVNVPLY	No		21	1	ACA63864.1	0	3998.07	High	7.4
FALSE	High	AQGTFLQPHQIAQLEVMTSIALRTLPT	No		72	1	ACA63864.1; ACA63856.1	0	2964.6	High	7.39
FALSE	High	PHQIAQLEVMTSIALRILPTMCSVNVPLYRTTTSVP	No		114	1	AAV92049.1	0	3996.11	High	7.34
FALSE	High	LQPHQIAQLEVMTSIALRTLPT	No		137	1	ACA63864.1; ALN96402.1; ACA63856.1	0	2460.36	High	7.19
FALSE	High	AQGTFLQPHQIAQLEVMTSIALR	No		207	1	ACA63864.1; ACA63856.1; ACA63852.1; AAV92049.1	0	2552.37	High	7.1
FALSE	High	LQPHQIAQLEVMNSIALRNLPR	No		5	4	ACP27638.1	0	2541.41	High	6.96
FALSE	High	FLQPHQIAQLEVMTSIALR	No		254	1	ACA63864.1; ACA63856.1; ACA63852.1; AAV92049.1	0	2195.2	High	6.68
FALSE	High	SVAHSIIMQQEQQQGVPILRPLFQLAQGLGIIQPQQPA	No		1	1	P21292.1	0	4162.26	High	6.63
FALSE	High	LQPHQIAQLEVMTSIALR	No		301	2	ACA63864.1; ALN96402.1; ACA63856.1; ACA63852.1; AAV92049.1	0	2064.13	High	6.57
FALSE	High	TGVSGGIGPIGGQGVQGITGPTGHQGVRGAQGAQGVVGAVGVQGAQ	No		1	1	QEF17864.1	0	4079.11	High	6.54
FALSE	High	RYEAIRAIIYSIVLQEQQQVRGSIQTQQQQPQ	No		22	1	ACA63852.1	0	3800.02	High	6.39
FALSE	High	AIHSVVHSIIMQQQQQQQQQQG	No		1	1	P08453.1	0	2544.27	High	6.34
FALSE	High	GTTEIGLTGEKGSKGEPGIDGKPGQSGRKGLMGDLGMVGDKGIIG	No		1	1	XP_015373318.1	0	4371.23	High	6.33
FALSE	High	AQGTFLQPHQIAQLEVMTSIALR	No		207	1	ACA63864.1; ACA63856.1; ACA63852.1; AAV92049.1	0	2568.36	High	6.25
FALSE	High	QGPQGIQGVQGEIGPTGPQGIQGPQGIQGVTGATGAQGPQGIQGPQG	No		1	1	QEF19194.1	0	4388.2	High	6.16
FALSE	High	ASIVAGIGGQ	No		1	3	P08453.1	0	872.484	High	3.94
FALSE	High	MNTLLVFALLAAAATGAIAHMETICILGLERPWQHL	No		1	1	AAV92049.1	0	3905.06	High	3.15
FALSE	High	SQQRPPFSQQQQQPVLPQQPPFS	Yes	Low molecular weight glutenin	16	2	ALN96402.1	0	2677.35	High	7.57
FALSE	High	AIHNVVHAIILHQQQK	Yes	Alpha gliadin	301	1	AFQ13474.1	0	1849.06	High	6.52
FALSE	High	IPEQSRYDAIRAIIYSIVLQEQQHGQG	Yes	Alpha gliadin	61	1	ALN96402.1	0	3112.62	High	6.39
FALSE	High	QPQQPFPQQPQQPQQPFPQPQQPFPW	Yes	Alpha gliadin	1	1	CAR82265.1	0	3153.53	High	6.3
FALSE	High	QPPFLQQQQPSLPQQPPFSQQQQQLVLPQQQIPFVHP	Yes	Low molecular weight glutenin	12	1	ACA63856.1	0	4329.26	High	6.21
FALSE	High	SPQRPGQGQQPGQGQQGYYPTSPQ	Yes	High molecular weight glutenin	6	1	ABG68042.1	0	2571.2	High	6.19
FALSE	High	PQQPQLPFPQQPQQPFPQPQ	Yes	Alpha gliadin	1	2	P21292.1	0	2355.19	High	5.83
FALSE	High	TQQPQQPFPQQPQQPFPQ	Yes	Alpha gliadin	1	2	P08453.1	0	2149.05	High	5.72
FALSE	High	LQLQPFPQPQLPYPQPHLPYPQPQPF	Yes	Alpha gliadin	18	1	AFQ13469.1	0	3095.61	High	5.71
FALSE	High	YPQPQLPYPQPQLPYPQPQP	Yes	Alpha gliadin	29	1	ABQ52117.1	0	2376.2	High	5.52
FALSE	High	PQLFPQPQPFPPQLPYPQPQ	Yes	Alpha gliadin	3	1	AWK59801.1	0	2344.21	High	5.45
FALSE	High	LQLQPFPQPQ	Yes	Alpha gliadin	510	2	AFQ13474.1; ABQ52117.1; AFQ13469.1	0	1195.65	High	3.22

## Sheet: 60 min SI  No Actinidin
Peptide profiles of the gastric and small intestinal digested samples without actinidin at 60 min
Checked	Confidence	Sequence	Immunogenic or not	Protein	# Proteins	# PSMs	Master Protein Accessions	# Missed Cleavages	Theo. MH+ [Da]	Confidence (by Search Engine): Sequest HT	XCorr (by Search Engine): Sequest HT
FALSE	High	AQGTFLQPHQIAQLEVMTSIALRTLPT	No		72	3	ALN96381.1	0	2964.6	High	8.24
FALSE	High	LQPHQIAQLEVMTSIALR	No		301	2	ALN96381.1; ABY58133.1; ALN96402.1	0	2048.13	High	7.79
FALSE	High	LQPHQIAQLEVMTSIALRILPT	No		119	2	ABY58133.1	0	2472.4	High	7.02
FALSE	High	LQPHQIAQLEVMTSIALRTLPT	No		137	1	ALN96381.1; ALN96402.1	0	2460.36	High	6.85
FALSE	High	FLQPHQIAQLEVMTSIALR	No		254	1	ALN96381.1; ABY58133.1	0	2211.2	High	6.37
FALSE	High	LQQPPFSQQRPPFSQQQ	No		15	1	ALN96402.1	0	2041.03	High	4.89
FALSE	High	GTSSQTVQGYYPGVTSPR	No		10	1	P10387.1	0	1884.91	High	4.84
FALSE	High	WGTSSQTVQGYYPGVTSPR	No		10	1	P10387.1	0	2070.99	High	4.82
FALSE	High	TGAQGLQGIQGIQGPIGPTGPEGSQGIQGIPGPTGVTGEQGIQGV	No		1	1	QEF19194.1	0	4194.14	High	4.47
FALSE	High	PFIQPSLQ	No		2	1	P08453.1	0	929.509	High	3.08
FALSE	High	YPGQASPQRPGQGQQPGQGQQGYYPTSPQQPGQW	Yes	High molecular weight glutenin	6	1	ABG68042.1	0	3683.7	High	6.89
FALSE	High	AIHNVVHAIILHQQQK	Yes	Alpha gliadin	301	1	AGO17657.1; AKC91154.1; ABQ52123.1	0	1849.06	High	6.82
FALSE	High	SHQQQPFPQQPYPQQPYPSQQPY	Yes	Alpha gliadin	1	1	CAR82265.1	0	2798.3	High	5.55
FALSE	High	PQLFPQPQPFPPQLPYPQPQ	Yes	Alpha gliadin	3	1	AWK59801.1	0	2344.21	High	5.47
FALSE	High	SHQQQPFPQQPYPQQPYPS	Yes	Alpha gliadin	1	2	CAR82265.1	0	2282.06	High	5.26
FALSE	High	TQQPQQPFPQQPQQPFPQ	Yes	Alpha gliadin	1	2	P08453.1	0	2149.05	High	5.23
FALSE	High	IGQGQQGYYPTSPQHPGQR	Yes	High molecular weight glutenin	21	2	AEO45111.1	0	2099.01	High	5.2
FALSE	High	YSSSLQQPGQGLQGHYPASL	Yes	High molecular weight glutenin	7	2	AEO45111.1	0	2118.03	High	5.17
FALSE	High	ISQQPQQPFPQQPHQPQQPYPQ	Yes	Alpha gliadin	1	1	CAR82265.1	0	2626.28	High	5
FALSE	High	LQLQPFPQPQPFPPQLPYPQPQ	Yes	Alpha gliadin	47	5	ABQ52123.1	0	2585.36	High	5
FALSE	High	SQQQQPPFSQQQPPFSQQ	Yes	Low molecular weight glutenin	78	2	ABY58133.1; ALN96402.1	0	2114.99	High	4.99
FALSE	High	QFPGQQQPFPPQRPYPQPQP	Yes	Alpha gliadin	1	8	AFQ13464.1	0	2362.17	High	4.98
FALSE	High	PQLPFPQQPQQPFPQPQ	Yes	Alpha gliadin	1	3	P21292.1	0	2002.02	High	4.96
FALSE	High	LQLQPFPQPQLPYPQPQPF	Yes	Alpha gliadin	46	3	AKC91154.1	0	2263.19	High	4.91
FALSE	High	PQPQPFPPQLPYPQPQ	Yes	Alpha gliadin	63	1	AWK59801.1; ABQ52123.1	0	1858.95	High	4.9
FALSE	High	SHQQQPFPQQPYPQQPY	Yes	Alpha gliadin	1	1	CAR82265.1	0	2097.98	High	4.9
FALSE	High	QLGQGQPGYYPTSQQPGQK	Yes	High molecular weight glutenin	25	1	ANO59365.1	0	2062	High	4.84
FALSE	High	MQLQPFPQPQLPYPQPQ	Yes	Alpha gliadin	67	1	AGO17657.1	0	2037.03	High	4.82
FALSE	High	QPFPQQPQQPFPQPQ	Yes	Alpha gliadin	1	1	CAR82265.1	0	1791.88	High	4.71
FALSE	High	QQPQLPFPQQPQQPFPQ	Yes	Alpha gliadin	1	1	P21292.1	0	2033.02	High	4.71
FALSE	High	LQLQPFPQPQ	Yes	Alpha gliadin	510	1	AKC91154.1; AFQ13464.1; ABQ52123.1	0	1195.65	High	2.88
